# Supplementary material for: Exploration of 4-substituted thiophene-based azo dyes for dye-sensitized solar cells and non-linear optical materials: synthesis and an in silico approach
Source: Royal Society of Chemistry journal article supplement (doi:10.1039/d4cp00918e), 2024-01-01
Supplement: d4cp00918e1.pdf [file d4cp00918e1.pdf]

## Supplementary information

### Exploration of 4-substituted thiophene-based azo dyes for Dye-sensitized solar cells and non-linear optical material: Synthesis and an in-silico approach

| Sr. No. | Title                                                                                                                                                                                                                              | Page |
|---------|------------------------------------------------------------------------------------------------------------------------------------------------------------------------------------------------------------------------------------|------|
| 1       | The theoretical background of DSSC                                                                                                                                                                                                 | 2    |
| 2       | SI Table 1 Computed bond lengths of SR1 to SR 9 in gas phase optimized at B3LYP/6-111++G (d, p) level of theory                                                                                                                    | 3    |
| 3       | SI Table 2 Computed bond lengths of SR1 to SR9 in DMF optimized at B3LYP/6-111++G (d, p) level of theory                                                                                                                           | 3    |
| 4       | SI Table 3 Computed HOMO, LUMO, gap, dipole moment, $\mu$ , $\eta$ , $\omega$ , and $\Gamma$ of SR1 to SR9 optimized at B3LYP/6-311++G (d, p) level of theory                                                                      | 3    |
| 5       | SI Table 4 Simulated $\lambda_{\text{vert}}$ , $E_{\text{vert}}$ , $f$ , LHE, $\tau_0$ and % OC of SR1 to SR9 at TD-DFT/CAM-B3LYP/6-311++G (d, p) level of theory                                                                  | 3    |
| 6       | SI Table 5 Simulated $\lambda_{\text{vert}}$ , $E_{\text{vert}}$ , $f$ , LHE, $\tau_0$ and % OC of SR1 to SR9 at TD-DFT/ $\omega$ B97XD/6-311++G (d, p) level of theory                                                            | 4    |
| 7       | SI Fig. 1 Energies profile diagram of SR1 to SR9 optimized at B3LYP/6-311++G (d, p) level of theory                                                                                                                                | 4    |
| 8       | SI Fig. 2 Optimized geometries, HOMO, and LUMO diagram of SR5 to SR9 optimized at DFT/B3LYP/LANL2DZ/6-31G(d)                                                                                                                       | 5    |
| 9       | SI Fig. 3 A comparative HOMO-LUMO energy level diagram of SR1 to SR9 with and without TiO <sub>2</sub> cluster optimized at B3LYP/6-311++G (d, p) and B3LYP/6-31G (d)/LANL2DZ                                                      | 5    |
| 10      | SI Fig. 4 MEP plots of SR1 to SR9 bound to TiO <sub>2</sub> at DFT/B3LYP/6-31G(d)/LANL2DZ level of theory                                                                                                                          | 6    |
| 11      | SI Table 6 Computed linear polarizability of SR1 to SR9 dyes                                                                                                                                                                       | 6    |
| 12      | SI Fig. 5 TGA patterns of SR1 to SR4 dye                                                                                                                                                                                           | 7    |
| 13      | Materials and methods                                                                                                                                                                                                              | 8    |
| 14      | Fabrication of Cell                                                                                                                                                                                                                | 8    |
| 15      | Synthesis of couplers 2-aminothiophene-3-carbonitrile (C1) and 2-amino-4-methylthiophene-3-carbonitrile (C2)                                                                                                                       | 9    |
| 16      | Synthesis of 2-(1-phenylethylidene)malononitrile (S5), 2-(1-(4-methoxyphenyl)ethylidene)malononitrile (S6) and couplers 2-amino-4-phenylthiophene-3-carbonitrile (C3) and 2-amino-4-(4-methoxyphenyl)thiophene-3-carbonitrile (C4) | 9    |
| 17      | FTIR Spectrum                                                                                                                                                                                                                      | 10   |
| 18      | <sup>1</sup> H NMR spectrum                                                                                                                                                                                                        | 12   |
| 19      | <sup>13</sup> C NMR spectrum                                                                                                                                                                                                       | 16   |
| 20      | HRLCMS spectrum                                                                                                                                                                                                                    | 20   |
| 21      | DOS Spectrum of title dyes and dyes@TiO <sub>2</sub>                                                                                                                                                                               | 22   |
| 22      | References                                                                                                                                                                                                                         | 24   |

## The theoretical background of DSSC

The power conversion efficiency ( $\eta_p$ ) is well known to be one of the most parameters that characterize the performance of DSSC devices, and it is commonly determined through the open-circuit photovoltage ( $V_{oc}$ ), short-circuit current density ( $J_{sc}$ ), fill factor ( $FF$ ), and incident solar power ( $P_{inc}$ ), as shown below.<sup>1-3</sup>

$$\eta_p = \frac{J_{sc} V_{oc} FF}{P_{inc}} \quad 1$$

The  $J_{sc}$  of DSSCs is influenced by both the dyes' absorption coefficient and how  $TiO_2$  interacts with the sensitizers. The following equation can be used for calculating the  $J_{sc}$ .<sup>2,4</sup>

$$J_{sc} = \int LHE(\lambda) \Phi_{inj} \eta_{coll} d\lambda \quad 2$$

where **LHE** = light-harvesting efficiency at highest absorption maxima

$\Phi_{inj}$  = Electron injection efficiency

$\eta_{coll}$  = Charge collection efficiency

when  $\eta_{coll}$  in a system is considered constant, the LHE ( $\lambda$ ) is calculated as<sup>2-5</sup>

$$LHE = 1 - 10^{-f} \quad 3$$

where **f** denotes the oscillator strength of dye at a particular wavelength. In contrast,  $\Phi_{inj}$  is associated with the driving force ( $G_{inject}$ ) of electrons injected to the semiconductor from the dye's excited state, as discussed below<sup>2-5</sup>

$$\Phi_{inj} \propto (-\Delta G_{inject}) \quad 4$$

$$\text{where, } \Delta G_{inject} = E_{ox}^{dye*} - E_{CB} \quad 5$$

where  $E_{ox}^{dye*}$  is dyes' excited state oxidation potential and  $E_{CB}$  is the semiconductor ( $TiO_2$ ) conduction band ( $E_{CB}(TiO_2) = -4.0$  eV).<sup>2-5</sup>  $E_{ox}^{dye*}$  of a dye can be calculated through the equation given below<sup>2-5</sup>

$$E_{ox}^{dye*} = E_{ox}^{dye} - E_{vert} \quad 6$$

where  $E_{ox}^{dye}$  is the dye's ground state oxidation potential energy and  $E_{vert}$  is the vertical excitation energy associated with  $\lambda_{vert}$ .  $E_{ox}^{dye}$  is defined as the negative of highest occupied molecular orbital energy ( $E_{HOMO}$ ).

Sensitizer's effectiveness in DSSC is impacted by the driving force of regeneration ( $\Delta G_{reg}$ ) energy since it directly affects the short circuit current ( $J_{sc}$ ). The following equation can be used to determine  $\Delta G_{reg}$ .<sup>5</sup>

$$\Delta G_{reg} = E_{redox} - E_{ox}^{dye} \quad 7$$

where  $E_{redox}$  is the electrolyte's redox potential i.e.,  $I^-/I_3^- = -4.80$  eV.

In DSSCs,  $V_{oc}$  can be determined by the energy difference between dye's lowest unoccupied molecular orbital (LUMO) and  $E_{CB}$  as follows<sup>2,3</sup>

$$V_{oc} = E_{LUMO} - E_{CB} \quad 8$$

here  $E_{LUMO}$  is the dyes LUMO energy.

SI Table 1 Computed bond lengths of SR1 to SR9 in gas phase optimized at B3LYP/6-111++G (d, p) level of theory

| Dyes | N-C                | C=C                | C-C                | C=C                | C-N                | N=N                | N-C                | C=C                | C-C                | C=C                 | C-C                 | C=O                 |
|------|--------------------|--------------------|--------------------|--------------------|--------------------|--------------------|--------------------|--------------------|--------------------|---------------------|---------------------|---------------------|
|      | b <sub>1</sub> (Å) | b <sub>2</sub> (Å) | b <sub>3</sub> (Å) | b <sub>4</sub> (Å) | b <sub>5</sub> (Å) | b <sub>6</sub> (Å) | b <sub>7</sub> (Å) | b <sub>8</sub> (Å) | b <sub>9</sub> (Å) | b <sub>10</sub> (Å) | b <sub>11</sub> (Å) | b <sub>12</sub> (Å) |
| SR1  | 1.348              | 1.403              | 1.416              | 1.373              | 1.353              | 1.267              | 1.409              | 1.382              | 1.382              | 1.405               | 1.506               | 1.205               |
| SR2  | 1.348              | 1.401              | 1.425              | 1.382              | 1.349              | 1.270              | 1.407              | 1.406              | 1.382              | 1.406               | 1.505               | 1.206               |
| SR3  | 1.349              | 1.401              | 1.430              | 1.390              | 1.347              | 1.271              | 1.406              | 1.406              | 1.382              | 1.406               | 1.505               | 1.206               |
| SR4  | 1.348              | 1.401              | 1.432              | 1.394              | 1.343              | 1.274              | 1.406              | 1.409              | 1.379              | 1.409               | 1.475               | 1.221               |
| SR5  | 1.349              | 1.400              | 1.434              | 1.398              | 1.339              | 1.276              | 1.404              | 1.410              | 1.378              | 1.409               | 1.473               | 1.221               |
| SR6  | 1.349              | 1.400              | 1.433              | 1.394              | 1.343              | 1.274              | 1.404              | 1.407              | 1.381              | 1.406               | 1.504               | 1.206               |
| SR7  | 1.349              | 1.400              | 1.433              | 1.394              | 1.343              | 1.274              | 1.405              | 1.407              | 1.382              | 1.406               | 1.504               | 1.206               |
| SR8  | 1.348              | 1.400              | 1.432              | 1.394              | 1.344              | 1.273              | 1.405              | 1.407              | 1.381              | 1.406               | 1.504               | 1.206               |
| SR9  | 1.350              | 1.400              | 1.429              | 1.386              | 1.349              | 1.270              | 1.407              | 1.406              | 1.382              | 1.406               | 1.505               | 1.206               |

SI Table 2 Computed bond lengths of SR1 to SR9 in DMF optimized at B3LYP/6-111++G (d, p) level of theory

| Dyes | N-C                | C=C                | C-C                | C=C                | C-N                | N=N                | N-C                | C=C                | C-C                | C=C                 | C-C                 | C=O                 |
|------|--------------------|--------------------|--------------------|--------------------|--------------------|--------------------|--------------------|--------------------|--------------------|---------------------|---------------------|---------------------|
|      | b <sub>1</sub> (Å) | b <sub>2</sub> (Å) | b <sub>3</sub> (Å) | b <sub>4</sub> (Å) | b <sub>5</sub> (Å) | b <sub>6</sub> (Å) | b <sub>7</sub> (Å) | b <sub>8</sub> (Å) | b <sub>9</sub> (Å) | b <sub>10</sub> (Å) | b <sub>11</sub> (Å) | b <sub>12</sub> (Å) |
| SR1  | 1.335              | 1.413              | 1.411              | 1.377              | 1.348              | 1.273              | 1.407              | 1.408              | 1.380              | 1.407               | 1.493               | 1.215               |
| SR2  | 1.336              | 1.410              | 1.421              | 1.386              | 1.344              | 1.274              | 1.407              | 1.403              | 1.385              | 1.403               | 1.489               | 1.209               |
| SR3  | 1.335              | 1.411              | 1.425              | 1.392              | 1.343              | 1.276              | 1.405              | 1.409              | 1.380              | 1.407               | 1.492               | 1.215               |
| SR4  | 1.335              | 1.410              | 1.427              | 1.395              | 1.340              | 1.278              | 1.404              | 1.410              | 1.380              | 1.408               | 1.491               | 1.216               |
| SR5  | 1.336              | 1.409              | 1.431              | 1.403              | 1.334              | 1.283              | 1.400              | 1.411              | 1.380              | 1.408               | 1.489               | 1.216               |
| SR6  | 1.336              | 1.410              | 1.428              | 1.398              | 1.339              | 1.279              | 1.403              | 1.410              | 1.380              | 1.408               | 1.491               | 1.216               |
| SR7  | 1.336              | 1.410              | 1.428              | 1.397              | 1.339              | 1.279              | 1.403              | 1.408              | 1.380              | 1.408               | 1.491               | 1.216               |
| SR8  | 1.335              | 1.410              | 1.427              | 1.395              | 1.341              | 1.278              | 1.403              | 1.410              | 1.380              | 1.408               | 1.491               | 1.215               |
| SR9  | 1.335              | 1.411              | 1.423              | 1.388              | 1.345              | 1.274              | 1.406              | 1.409              | 1.380              | 1.407               | 1.492               | 1.215               |

SI Table 3 Computed HOMO, LUMO, gap, dipole moment,  $\mu$ ,  $\eta$ ,  $\omega$ , and  $\Gamma$  of SR1 to SR9 optimized at B3LYP/6-311++G (d, p) level of theory

| Dyes | Phase  | HOMO-1 | HOMO   | LUMO   | GAP*  | $\mu$ | $\eta$ | $\omega$ | $\Gamma$ | Dipole Moment |
|------|--------|--------|--------|--------|-------|-------|--------|----------|----------|---------------|
|      |        | eV     | eV     | eV     | eV    | eV    | eV     | eV       | eV       | Debye         |
| SR1  | Vacuum | -7.247 | -6.375 | -3.284 | 3.091 | 4.830 | 1.546  | 7.546    | 2.220    | 9.387         |
|      | DMF    | -7.075 | -6.108 | -3.118 | 2.990 | 4.613 | 1.495  | 7.117    | 2.023    | 13.675        |
| SR2  | Vacuum | -7.141 | -6.267 | -3.164 | 3.103 | 4.715 | 1.551  | 7.167    | 2.228    | 9.000         |
|      | DMF    | -6.955 | -6.003 | -2.992 | 3.011 | 4.497 | 1.505  | 6.718    | 2.059    | 10.889        |
| SR3  | Vacuum | -7.023 | -6.211 | -3.232 | 2.979 | 4.721 | 1.489  | 7.483    | 2.167    | 8.253         |
|      | DMF    | -6.933 | -6.041 | -3.138 | 2.903 | 4.590 | 1.452  | 7.255    | 2.012    | 12.442        |
| SR4  | Vacuum | -6.574 | -6.023 | -3.165 | 2.858 | 4.594 | 1.429  | 7.383    | 2.307    | 5.108         |
|      | DMF    | -6.534 | -5.954 | -3.098 | 2.856 | 4.526 | 1.428  | 7.172    | 2.275    | 10.959        |
| SR5  | Vacuum | -6.137 | -5.567 | -3.001 | 2.566 | 4.284 | 1.283  | 7.153    | 1.997    | 4.242         |
|      | DMF    | -6.077 | -5.510 | -3.027 | 2.483 | 4.268 | 1.242  | 7.337    | 1.915    | 9.795         |
| SR6  | Vacuum | -6.151 | -5.533 | -3.108 | 2.425 | 4.320 | 1.212  | 7.697    | 1.807    | 7.089         |
|      | DMF    | -6.058 | -5.515 | -3.097 | 2.418 | 4.306 | 1.209  | 7.670    | 1.876    | 11.051        |
| SR7  | Vacuum | -6.165 | -5.799 | -3.054 | 2.745 | 4.427 | 1.373  | 7.139    | 2.379    | 7.282         |
|      | DMF    | -6.104 | -5.779 | -3.071 | 2.708 | 4.425 | 1.354  | 7.231    | 2.382    | 11.275        |
| SR8  | Vacuum | -6.157 | -5.554 | -3.149 | 2.404 | 4.352 | 1.202  | 7.876    | 1.801    | 6.105         |
|      | DMF    | -6.064 | -5.580 | -3.120 | 2.460 | 4.350 | 1.230  | 7.691    | 1.976    | 9.562         |
| SR9  | Vacuum | -6.264 | -5.834 | -3.189 | 2.645 | 4.512 | 1.323  | 7.694    | 2.216    | 8.021         |
|      | DMF    | -6.119 | -5.858 | -3.139 | 2.719 | 4.498 | 1.359  | 7.443    | 2.457    | 12.392        |

\*GAP = LUMO-HOMO

SI Table 4 Simulated  $\lambda_{\text{vert}}$ ,  $E_{\text{vert}}$ ,  $f$ , LHE,  $\tau_0$  and % OC of SR1 to SR9 at TD-DFT/CAM-B3LYP/6-311++G (d, p) level of theory

| Dyes | $\lambda_{\text{vert}}$ (nm) |     | $E_{\text{vert}}$ (eV) |     | $f$    |     | LHE    |     | $\tau_0$ (sec) |     | % OC*  |     |
|------|------------------------------|-----|------------------------|-----|--------|-----|--------|-----|----------------|-----|--------|-----|
|      | Vacuum                       | DMF | Vacuum                 | DMF | Vacuum | DMF | Vacuum | DMF | Vacuum         | DMF | Vacuum | DMF |

|     |        |        |       |       |       |       |       |       |       |       |       |       |
|-----|--------|--------|-------|-------|-------|-------|-------|-------|-------|-------|-------|-------|
| SR1 | 371.55 | 423.99 | 3.337 | 2.924 | 0.939 | 1.223 | 0.885 | 0.940 | 0.143 | 0.143 | 95.22 | 89.69 |
| SR2 | 372.85 | 426.04 | 3.325 | 2.910 | 0.943 | 1.270 | 0.886 | 0.946 | 0.144 | 0.139 | 95.40 | 92.11 |
| SR3 | 387.89 | 438.80 | 3.196 | 2.826 | 0.827 | 1.169 | 0.851 | 0.932 | 0.177 | 0.161 | 95.78 | 92.36 |
| SR4 | 397.13 | 445.48 | 3.122 | 2.783 | 0.767 | 1.161 | 0.829 | 0.931 | 0.200 | 0.167 | 95.59 | 95.55 |
| SR5 | 428.74 | 476.28 | 2.892 | 2.603 | 0.333 | 0.943 | 0.536 | 0.886 | 0.538 | 0.235 | 59.69 | 81.20 |
| SR6 | 429.22 | 461.57 | 2.889 | 2.686 | 0.342 | 0.958 | 0.545 | 0.890 | 0.526 | 0.217 | 54.82 | 56.90 |
| SR7 | 426.51 | 452.58 | 2.907 | 2.740 | 0.068 | 0.981 | 0.144 | 0.896 | 2.624 | 0.204 | 18.62 | 74.21 |
| SR8 | 425.75 | 451.11 | 2.912 | 2.748 | 0.082 | 1.070 | 0.172 | 0.915 | 2.153 | 0.186 | 20.37 | 50.17 |
| SR9 | 426.42 | 436.85 | 2.908 | 2.838 | 0.031 | 1.226 | 0.068 | 0.941 | 5.795 | 0.152 | 10.33 | 43.42 |

\*OC calculated for major electronic contribution from HOMO to LUMO

SI Table 5 Simulated  $\lambda_{\text{verts}}$ ,  $E_{\text{verts}}$ ,  $f$ , LHE,  $\tau_0$  and % OC of SR1 to SR9 at TD-DFT/ $\omega$ B97XD/6-311++G (d, p) level of theory

| Dyes | $\lambda_{\text{vert}}$ (nm) |        | $E_{\text{vert}}$ (eV) |       | $f$    |       | LHE    |       | $\tau_0$ (sec) |       | % OC*  |       |
|------|------------------------------|--------|------------------------|-------|--------|-------|--------|-------|----------------|-------|--------|-------|
|      | Vacuum                       | DMF    | Vacuum                 | DMF   | Vacuum | DMF   | Vacuum | DMF   | Vacuum         | DMF   | Vacuum | DMF   |
| SR1  | 367.77                       | 416.19 | 3.371                  | 2.979 | 0.945  | 0.763 | 0.886  | 0.827 | 0.140          | 0.221 | 94.06  | 54.38 |
| SR2  | 369.48                       | 422.59 | 3.356                  | 2.934 | 0.948  | 1.055 | 0.887  | 0.912 | 0.140          | 0.165 | 94.35  | 75.91 |
| SR3  | 384.31                       | 434.99 | 3.226                  | 2.850 | 0.831  | 1.031 | 0.852  | 0.907 | 0.173          | 0.179 | 94.82  | 80.70 |
| SR4  | 392.57                       | 440.42 | 3.158                  | 2.815 | 0.780  | 1.164 | 0.834  | 0.931 | 0.193          | 0.163 | 94.52  | 94.17 |
| SR5  | 427.87                       | 465.38 | 2.898                  | 2.664 | 0.055  | 1.005 | 0.118  | 0.901 | 3.264          | 0.210 | 13.05  | 74.76 |
| SR6  | 409.85                       | 451.43 | 3.025                  | 2.747 | 0.649  | 1.009 | 0.775  | 0.902 | 0.253          | 0.197 | 56.31  | 46.28 |
| SR7  | 400.80                       | 445.87 | 3.093                  | 2.781 | 0.623  | 0.985 | 0.762  | 0.896 | 0.252          | 0.197 | 67.29  | 70.21 |
| SR8  | 399.99                       | 444.04 | 3.100                  | 2.792 | 0.706  | 1.084 | 0.803  | 0.918 | 0.221          | 0.177 | 44.59  | 44.36 |
| SR9  | 389.03                       | 430.47 | 3.187                  | 2.880 | 0.795  | 1.176 | 0.840  | 0.933 | 0.186          | 0.154 | 50.52  | 37.93 |

\*OC calculated for major electronic contribution from HOMO to LUMO

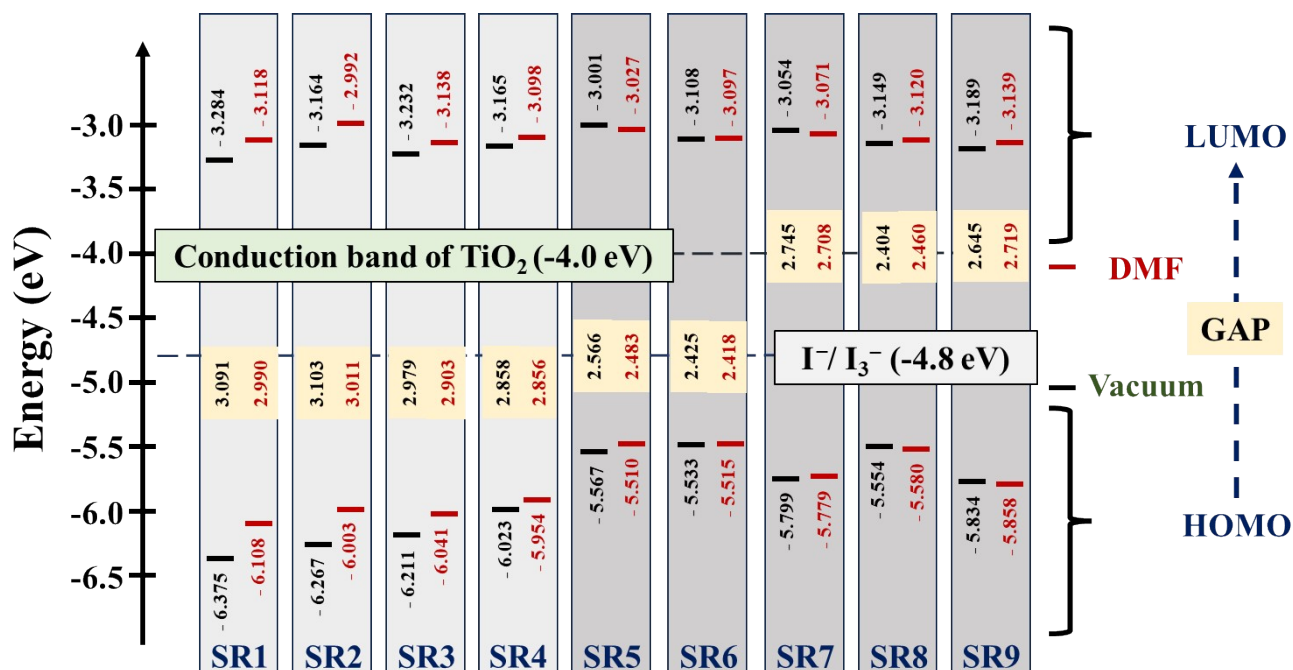

SI Fig. 1 Energies profile diagram of SR1 to SR9 optimized at B3LYP/6-311++G (d, p) level of theory

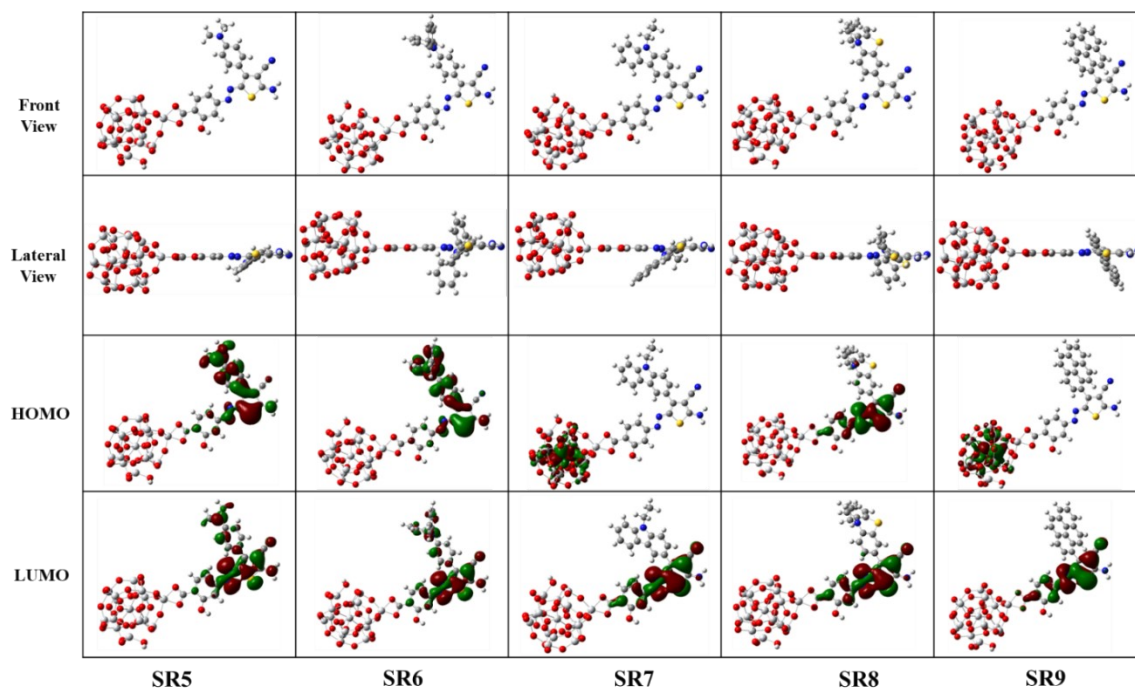

SI Fig. 2 Optimized geometries, HOMO, and LUMO diagram of SR5 to SR9 optimized at DFT/B3LYP/LANL2DZ/6-31G(d)

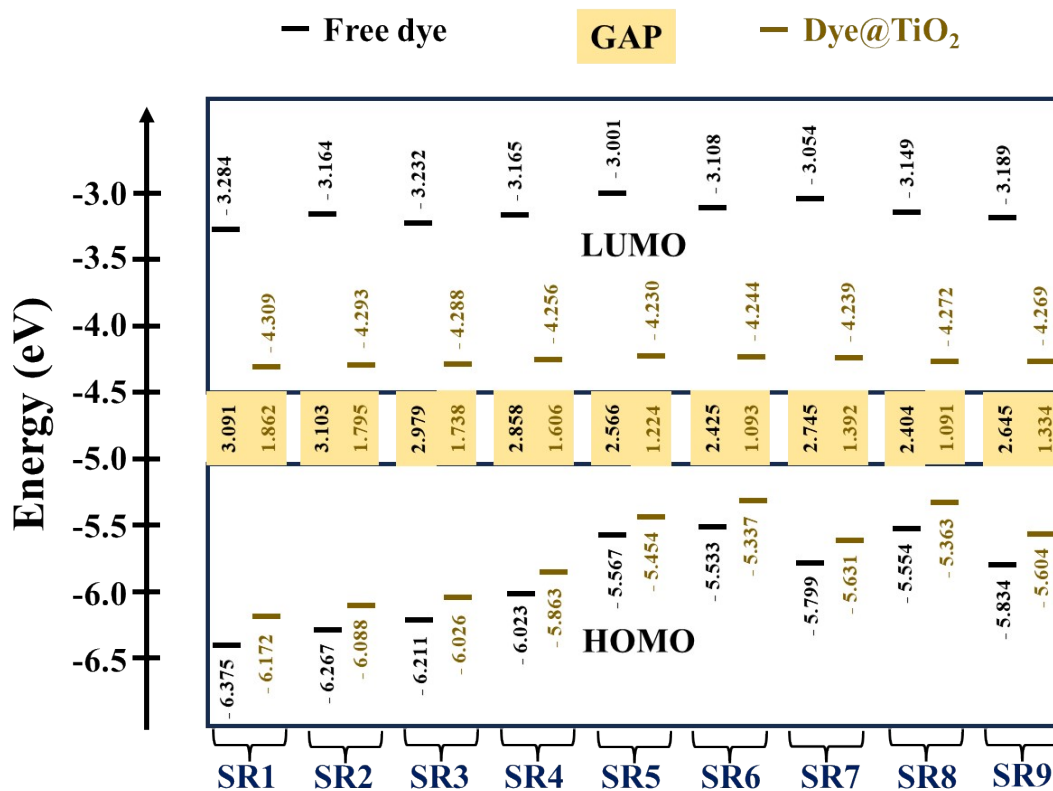

SI Fig. 3 A comparative HOMO-LUMO energy level diagram of SR1 to SR9 with and without TiO<sub>2</sub> cluster optimized at B3LYP/6-311++G (d, p) and B3LYP/6-31G (d)/LANL2DZ

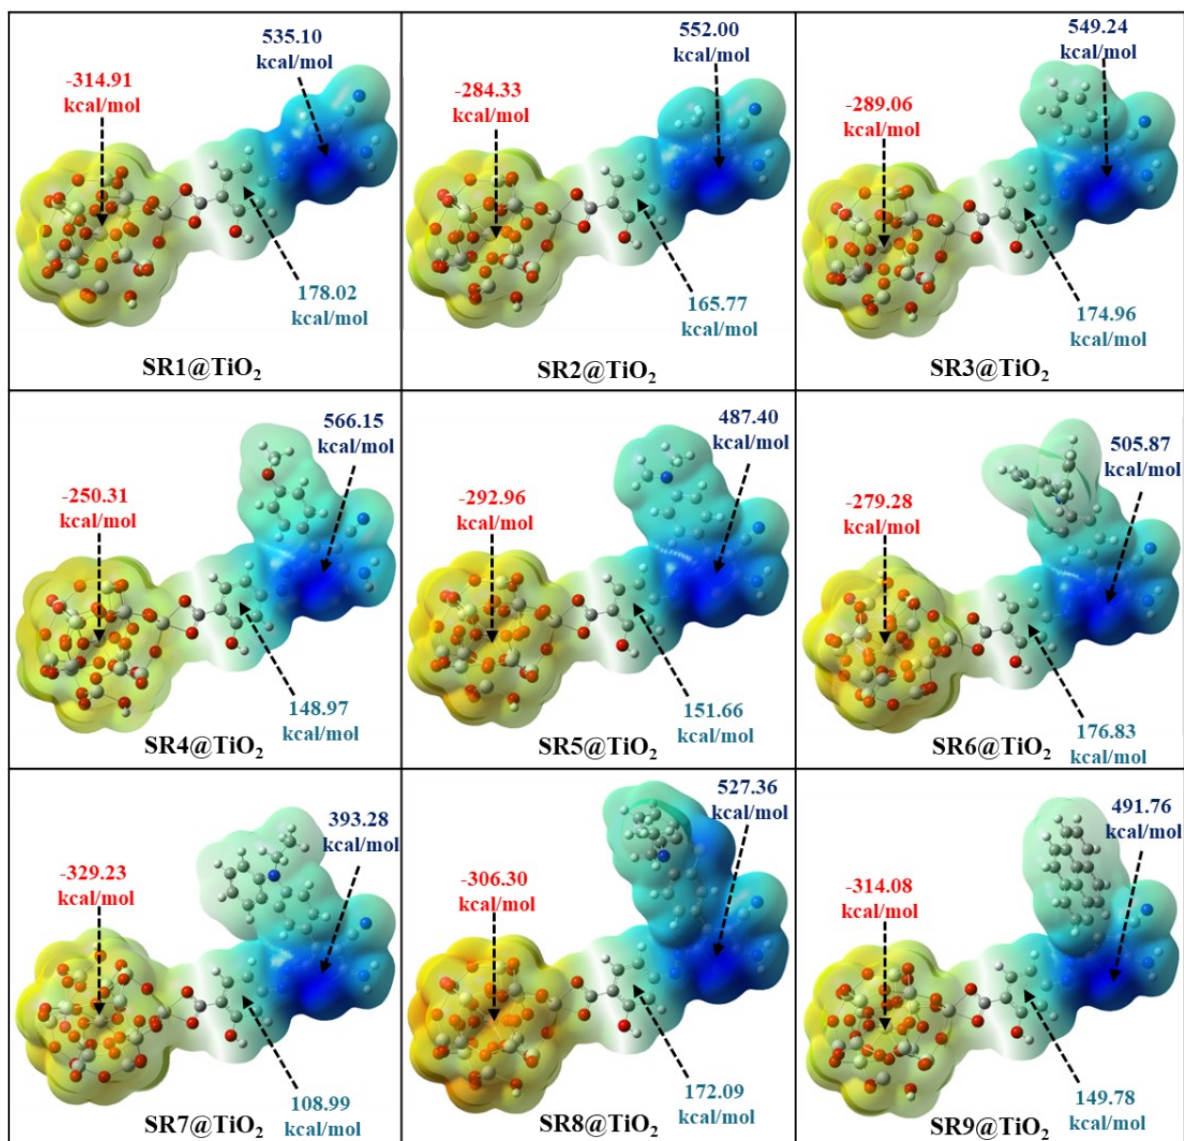

SI Fig. 4 MEP plots of SR1 to SR9 bound to TiO<sub>2</sub> at DFT/B3LYP/6-31G(d)/LANL2DZ level of theory

SI Table 6 Computed linear polarizability of AB1 to AB9 dyes

| Dyes | Linear polarizability ( $\alpha_0$ ) $\times 10^{-24}$ esu |        |           |        |                |        |
|------|------------------------------------------------------------|--------|-----------|--------|----------------|--------|
|      | B3LYP                                                      |        | CAM-B3LYP |        | $\omega$ B97XD |        |
|      | Vacuum                                                     | DMF    | Vacuum    | DMF    | Vacuum         | DMF    |
| SR1  | 38.90                                                      | 55.97  | 36.53     | 51.43  | 36.34          | 51.09  |
| SR2  | 40.78                                                      | 58.80  | 38.48     | 54.41  | 38.31          | 54.11  |
| SR3  | 49.72                                                      | 71.89  | 47.08     | 66.82  | 46.88          | 66.51  |
| SR4  | 53.56                                                      | 76.90  | 53.56     | 71.25  | 50.32          | 70.88  |
| SR5  | 58.84                                                      | 86.10  | 55.06     | 78.45  | 54.69          | 77.81  |
| SR6  | 77.80                                                      | 110.42 | 72.47     | 101.14 | 71.99          | 100.50 |
| SR7  | 67.91                                                      | 98.34  | 64.09     | 91.11  | 63.76          | 90.64  |
| SR8  | 71.53                                                      | 102.30 | 67.10     | 94.36  | 66.76          | 93.93  |
| SR9  | 70.88                                                      | 103.73 | 67.15     | 96.75  | 66.85          | 96.36  |

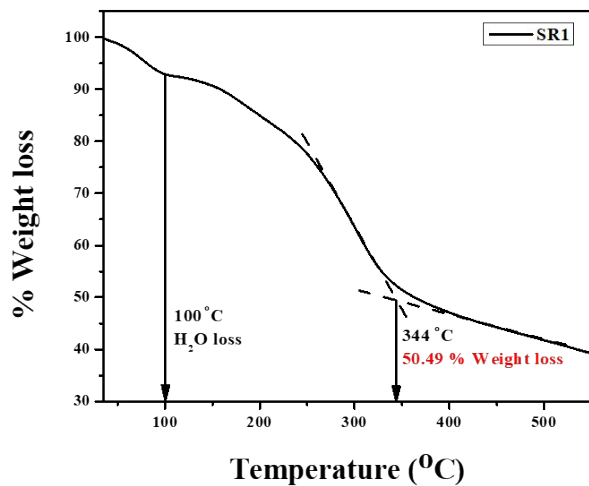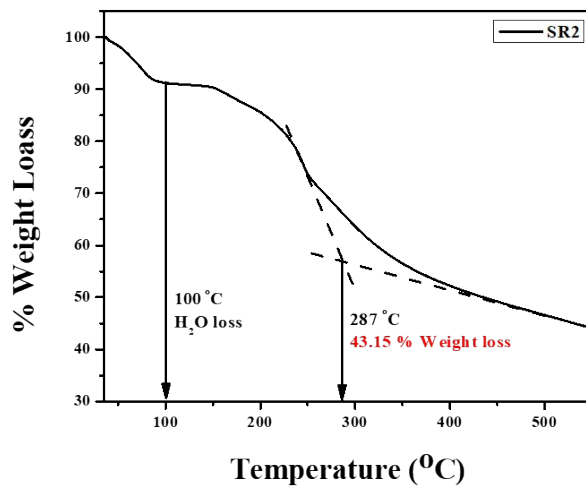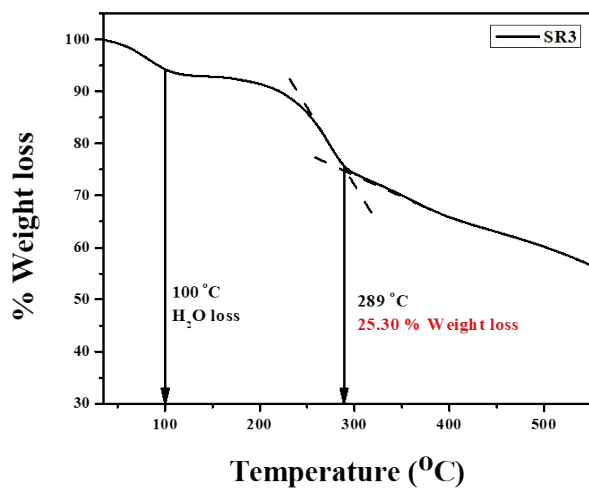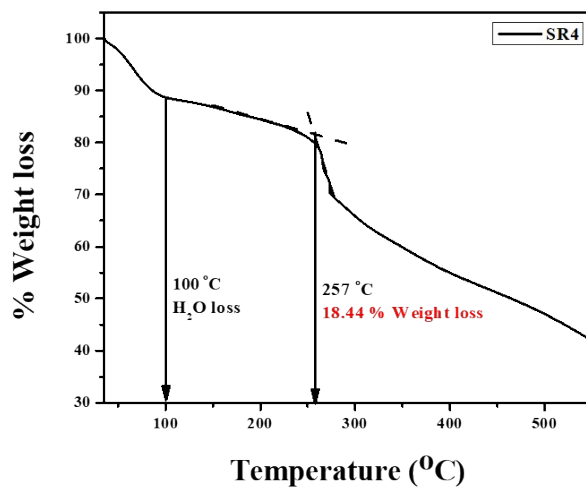

SI Fig. 5 TGA patterns of SR1 to SR4 dye

## Materials and methods

2,5-dihydroxy-1,4-dithiane, 2,5-dimethyl-1,4-dithiane-2,5-diol (Sigma-Aldrich), 4-amino benzoic acid, acetophenone, 1-(4-methoxyphenyl)ethan-1-one, malononitrile, triethylamine, ammonium acetate ( $\text{NH}_4\text{OAc}$ ), sodium nitrate ( $\text{NaNO}_2$ ), sulfur ( $\text{S}_8$ ), urea, glacial acetic acid (Gl. AcOH), concentrated hydrochloric acid (conc. HCl, 33%), sodium sulphate ( $\text{Na}_2\text{SO}_4$ ), n-hexane, toluene, ethyl acetate, methanol, and N, N-dimethylformamide (DMF) were bought from Spectrochem Chemicals Ltd, Mumbai, India. Solid and liquid solvents and reagents were used without any purification.  $\text{TiO}_2$  nanopowder, ethyl cellulose, and  $\alpha$ -terpineol were purchased from Sigma-Aldrich, India, and used without further purification. DN-ES104 electrolyte, which is an MNP-based electrolyte containing 3-methoxypropionitrile, 1-butyl-3-methylimidazolium iodide, guanidinium thiocyanate, iodine, and 1-butyl-1H-benzol[d]imidazole was purchased from “dynamo.” Solvents used for cyclic voltammetry (CV) were purified using a standard protocol and stored under 4A molecular sieves.

“Perkin Elmer spectrophotometer” with 1 cm quartz cells was used to record UV visible absorption spectra of the titled dyes. The dyes of 15  $\mu\text{M}$  are taken for UV visible study. The progress of reactions is observed by the Thin-layer chromatography (TLC) technique (60 F254) Merck, India. The recrystallization and column chromatography techniques were used to attain the purification of all compounds. The FT-IR bands of the synthesized dyes are recorded on the Bruker ALPHA-II instrument. “Agilent 400 and 500 MHz” with tetramethylsilane (TMS) as the internal standard was used to record the synthesized dyes’  $^1\text{H}$  NMR and  $^{13}\text{C}$  NMR spectra, respectively. The DMSO- $d_6$  solvent was used for sample preparation. “Shimadzu Lab solution instrument” with averaged ESI positive+ was used to analyze the mass of titled dyes. Cyclic voltammetry (CV) was performed in Metrohm Autolab electrochemical analyzer following a three-electrode system where a glassy carbon electrode acts as working, Pt-wire as counter, and Ag/Ag+ as reference electrode in DMF at 25 mV/sec scan rate. A supporting electrolyte was added 0.1 M TBAPF6, and the electrode was externally calibrated with ferrocene. Thermogravimetric analysis was carried out using the STA7300/Hitachi instrument. Most importantly, cell fabrication was carried out using Elixir technologies DSSC fabrication setup.

## Fabrication of Cell

The FTO (Fluorine Doped Tin Oxide) coated glass substrate was first treated with surfactant, distilled water, and alcohol before the doctor blading from titania paste made of nanocrystalline  $\text{TiO}_2$  and additives. The  $\text{TiO}_2$ -coated electrode was slowly heated in the muffle furnace at 500  $^\circ\text{C}$ . The resulting  $\text{TiO}_2$  thickness is approximately 12  $\mu\text{m}$ . The  $\text{TiO}_2$  was then deep for 20 hours at room temperature without exposure to light in a dye solution of sensitizer prepared by dissolving 30mg of dye sample into the solvent mixture of 60 ml of ethanol and 20 ml of acetonitrile. The counter electrode (Pt) was prepared through a screen printing technique on an FTO glass surface. The Pt-coated electrode was then heated slowly up to 500  $^\circ\text{C}$ . After cooling to room temperature, two holes were drilled to inject the electrolyte through them. The device was made by sandwiching these two opposing electrodes with a UV sealant. The cell was made harder by exposing it to UV light for 2 minutes. Later, the DN-ES104 electrolyte was injected into the cell through holes previously bored in the Pt-counter electrode. After that, both the holes were sealed with UV sealant and made harder by exposing the cell to UV light for 2 minutes. Before the photovoltaic test, all DSSC devices were kept in a dark area for 24 hours. The devices’ active area is approximately 1.0  $\text{cm}^2$ , and in order to reduce the effect of stray light during measurement, a black mask was employed as the aperture.<sup>6</sup>



**Synthesis of couplers 2-aminothiophene-3-carbonitrile (C1) and 2-amino-4-methylthiophene-3-carbonitrile (C2):** Couplers C1 and C2 were synthesized with the reported method described by Zita et al. <sup>7</sup> with some minor modification as discussed below.

**2-aminothiophene-3-carbonitrile (C1)** <sup>7</sup>: compound 2,5-dihydroxy-1,4-dithiane (S1) (1 equivalent, 0.066 mol, 10g) and malononitrile (2 equivalent, 0.131 mol, 8.67 g) were dissolved or mixed in methanol (20 mL). The resultant solution was allowed to cool around 10 °C. After cooling, triethylamine (1 equivalent, 0.066 mol, 7.16 mL) was slowly added to the stirred solution so that the reaction mixture's temperature would not rise drastically. After adding triethylamine, the reaction mixture was subjected to reflux between 60-70 °C. After completion of the reaction (usually takes 2-3 h), which was monitored through TLC, the reaction mixture was cooled and poured into the ice-cold water. The resultant precipitate was filtered and recrystallized with n-hexane to yield 7.6 g (93.14 %, M.p. = 102-104 °C) of pure pale-brown colored solid of C1.

**2-amino-4-methylthiophene-3-carbonitrile (C2)**: compound 2,5-dimethyl-1,4-dithiane-2,5-diol (S2) (1 equivalent, 0.055 mol, 10g) and malononitrile (2 equivalent, 0.111 mol, 7.33 g) were dissolved or mixed in methanol (20 mL). The resultant solution was allowed to cool around 10 °C. After cooling, triethylamine (1 equivalent, 0.055 mol, 7.73 mL) was slowly added to the stirred solution so that the reaction mixture's temperature would not rise drastically. After adding triethylamine, the reaction mixture was subjected to reflux between 60-70 °C. After completion of the reaction (usually takes 2-3 h), which was monitored through TLC, the reaction mixture was cooled and poured into the ice-cold water. The resultant precipitate was filtered and recrystallized with n-hexane to yield 6.95 g (90.67 %, M.p. = 116 - 118 °C) of pure off-white colored solid of C2.

**Synthesis of 2-(1-phenylethylidene)malononitrile (S5), 2-(1-(4-methoxyphenyl)ethylidene)malononitrile (S6) and couplers 2-amino-4-phenylthiophene-3-carbonitrile (C3) and 2-amino-4-(4-methoxyphenyl)thiophene-3-carbonitrile (C4)**

**Compounds S5 and S6 are synthesized as per the reported method given by Mogens et al. <sup>8</sup> with some modifications.**

**2-(1-phenylethylidene)malononitrile (S5)** <sup>8</sup>: Acetophenone (S3) (1 equivalent, 18.5 g, 0.154 mmol), malononitrile (2.8 equivalent, 28.4 g, 0.430 mmol), NH<sub>4</sub>OAc (3.37 equivalent, 40 g, 0.519 mmol), and AcOH (6.5 equivalent, 60 mL, 1 mol) are mixed in toluene (500 mL). The flask was equipped with a Dean-Stark apparatus, and the reaction mixture was refluxed at 180 °C for 3 h. After cooling the reaction mixture, the reaction mixture was diluted with ethyl acetate and, washed with water, brine, and dried with Na<sub>2</sub>SO<sub>4</sub>. Further evaporating the solvent and recrystallizing the crude brown solid with boiling heptane gave S5 (22.17 g, 85.61 %) as pale yellow crystals. Mp. 93.0 – 95.0 °C.

**2-(1-(4-methoxyphenyl)ethylidene)malononitrile (S6)**: 1-(4-methoxyphenyl)ethan-1-one (S4) (1 equivalent, 20.71 g, 0.138 mmol), malononitrile (2.8 equivalent, 25.50 g, 0.386 mmol), NH<sub>4</sub>OAc (3.37 equivalent, 35.82 g, 0.465 mmol), and AcOH (6.5 equivalent, 52 mL, 0.896 mol) are mixed in toluene (500 mL). The flask was equipped with a Dean-Stark apparatus, and the reaction mixture was refluxed at 180 °C for 3 h. After cooling the reaction mixture, the reaction mixture was diluted with ethyl acetate and, washed with water, brine, and dried with Na<sub>2</sub>SO<sub>4</sub>. Further evaporating the solvent and recrystallizing the crude brown solid with boiling heptane gave S5 (19.55 g, 71.53 %) as pale yellow crystals. Mp. 87.0 – 89.0 °C.

Couplers 2-(1-phenylethylidene)malononitrile (C3) and 2-amino-4-(4-methoxyphenyl)thiophene-3-carbonitrile (C4) were synthesized as per methods reported by Wardakhan et al. <sup>9</sup> with some modification.

2-amino-4-phenylthiophene-3-carbonitrile (C3) and 2-amino-4-(4-methoxyphenyl)thiophene-3-carbonitrile (C4) <sup>9</sup>: 2-(1-phenylethylidene)malononitrile (S5) (1 equivalent, 1.68 g, 0.01 mol), or 2-(1-(4-methoxyphenyl)ethylidene)malononitrile (S6) (1 equivalent, 1.98 g, 0.01 mol) and sulfur (1 equivalent, 0.32 g, 0.01 mol) in absolute ethanol (50 mL) containing triethylamine (0.5 mL) were heated under reflux for 2-3 h. After the reaction (confirming through TLC) was completed, the reaction mixture was poured into iced water, and the resultant precipitate was then recrystallized with absolute ethyl alcohol to yield 1.60g (80.0 %) of C3 and 1.06g (91.22%) of C4.

### FTIR Spectrum

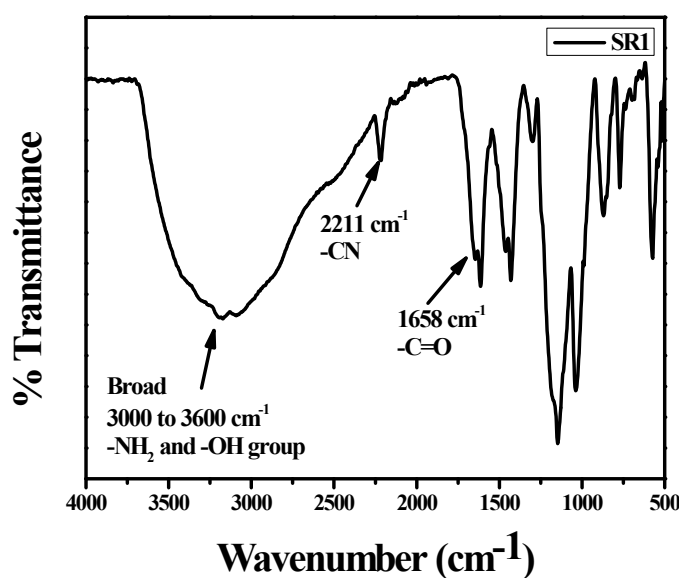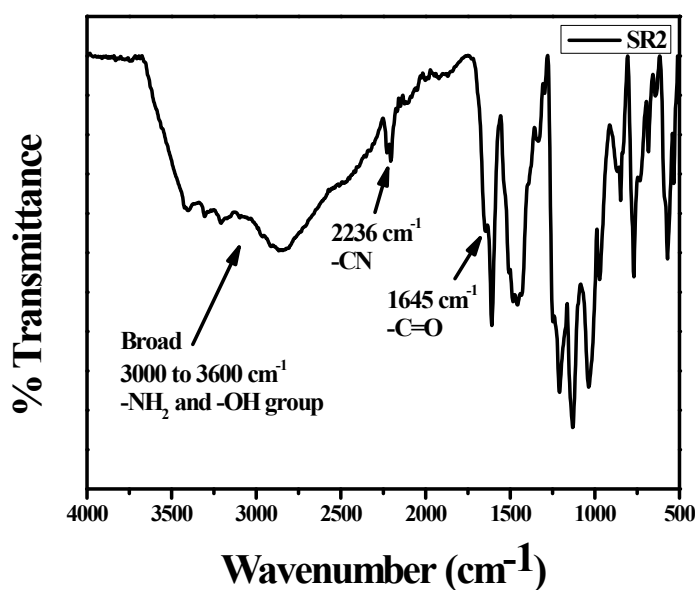

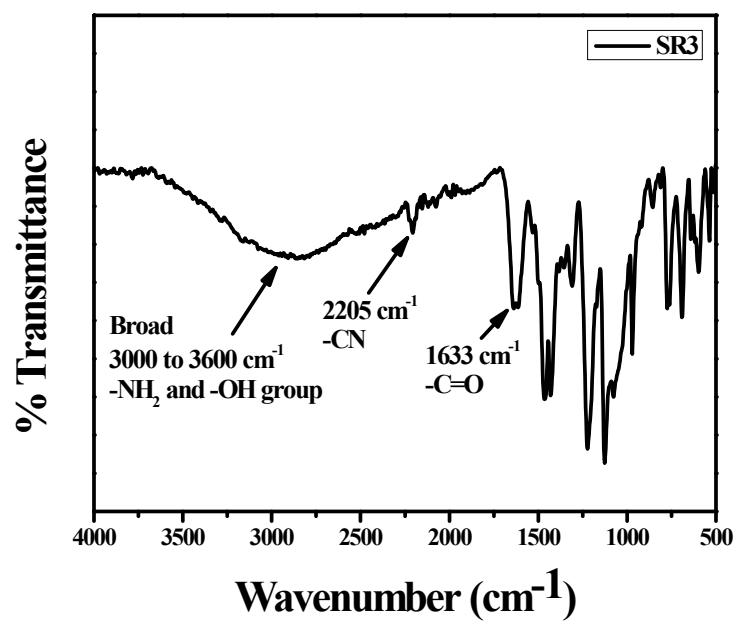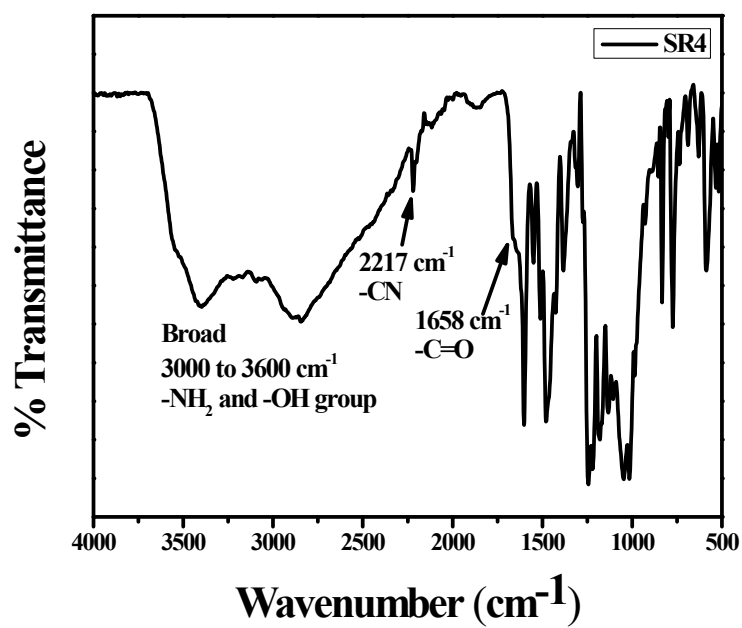

# <sup>1</sup>H NMR Spectrum

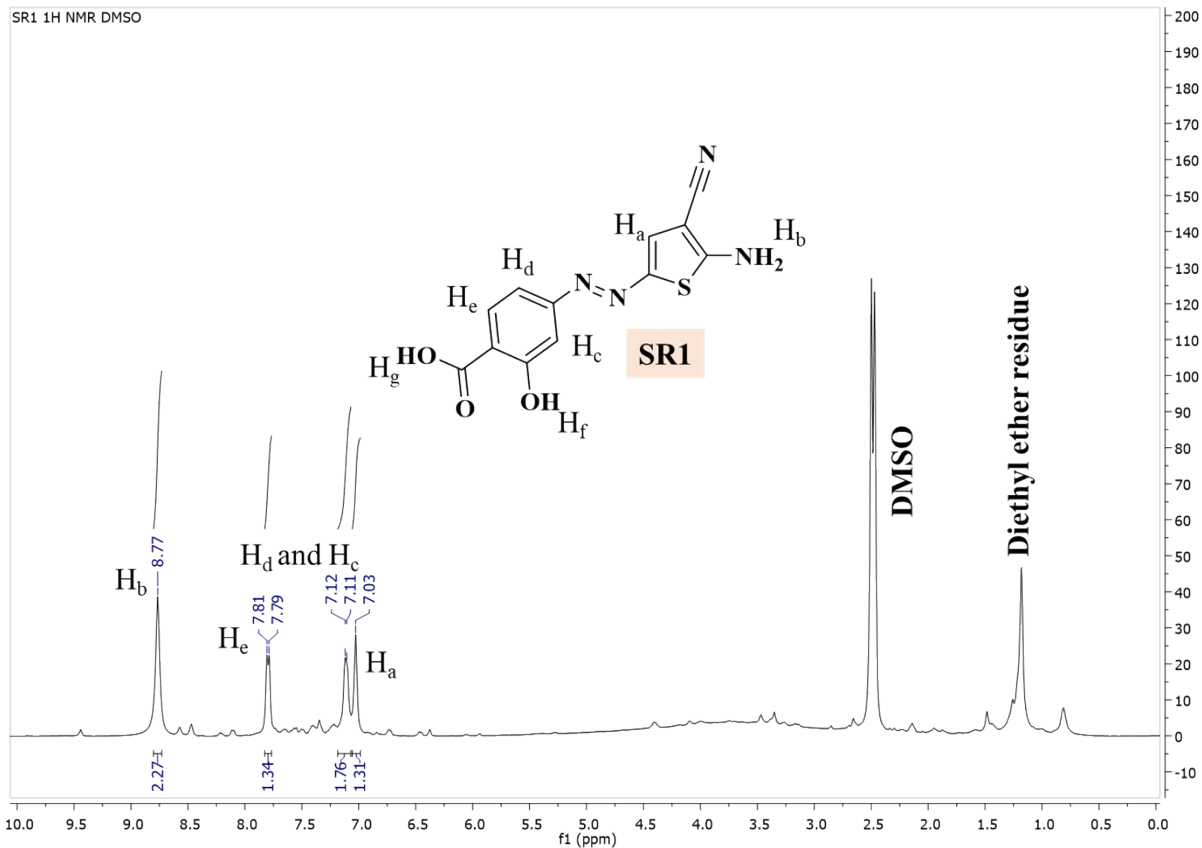

<sup>1</sup>H NMR (400 MHz, DMSO-d<sub>6</sub>) δ (H<sub>b</sub>) 8.77 (s, 2H), (H<sub>e</sub>) 7.80 (d, *J* = 7.3 Hz, 1H), (H<sub>c</sub> and H<sub>d</sub>) 7.11 (d, *J* = 5.4 Hz, 2H), (H<sub>a</sub>) 7.03 (s, 1H).

| Peak names     | δ (ppm) | Signal                   |
|----------------|---------|--------------------------|
| H <sub>a</sub> | 7.03    | s, 1H                    |
| H <sub>b</sub> | 8.77    | s, 2H                    |
| H <sub>c</sub> | 7.11    | d, <i>J</i> = 5.4 Hz, 2H |
| H <sub>d</sub> |         |                          |
| H <sub>e</sub> | 7.80    | d, <i>J</i> = 7.3 Hz, 1H |

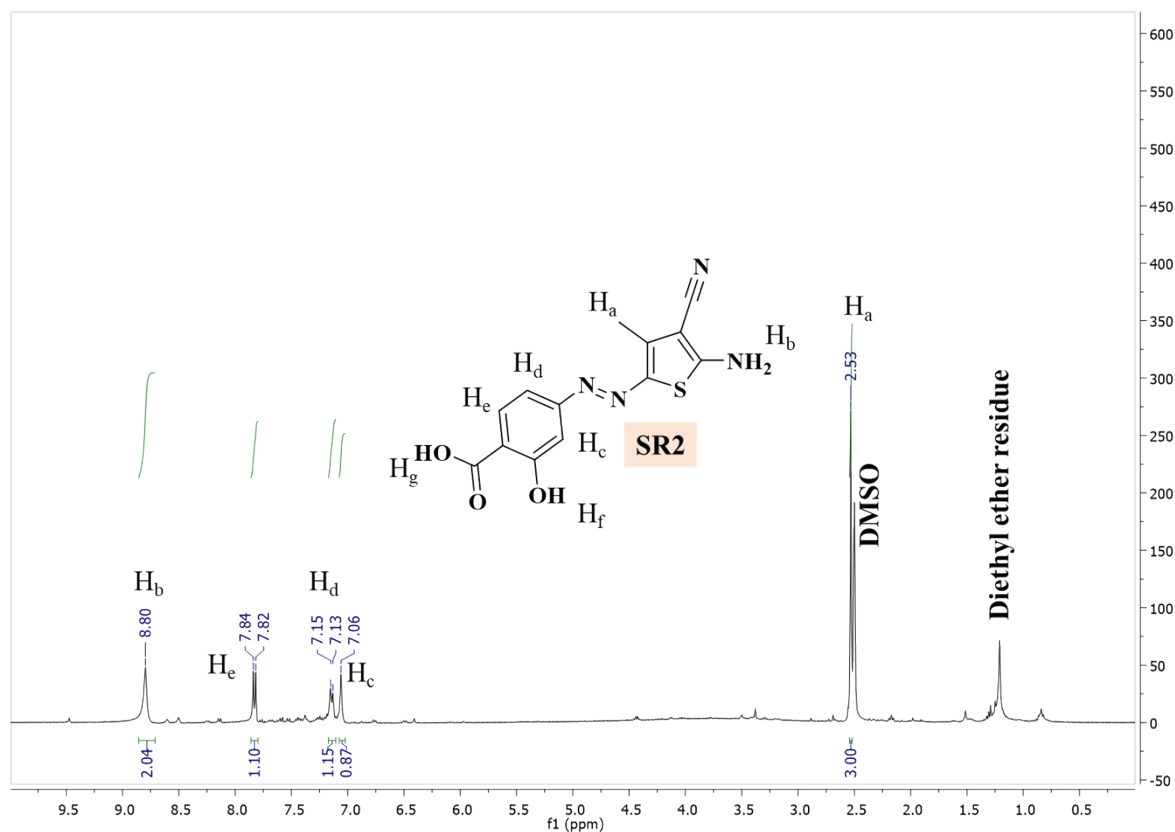

$^1\text{H}$  NMR (400 MHz, DMSO- $d_6$ )  $\delta$  (H<sub>b</sub>) 8.80 (s, 2H), (H<sub>e</sub>) 7.83 (d,  $J$  = 8.4 Hz, 1H), (H<sub>d</sub>) 7.14 (d,  $J$  = 8.1 Hz, 1H), (H<sub>c</sub>) 7.06 (s, 1H), (H<sub>a</sub>) 2.53 (s, 3H).

| Peak names     | $\delta$ (ppm) | Signal              |
|----------------|----------------|---------------------|
| H <sub>a</sub> | 2.53           | s, 3H               |
| H <sub>b</sub> | 8.80           | s, 2H               |
| H <sub>c</sub> | 7.06           | s, 1H               |
| H <sub>d</sub> | 7.14           | d, $J$ = 8.1 Hz, 1H |
| H <sub>e</sub> | 7.83           | d, $J$ = 8.4 Hz, 1H |

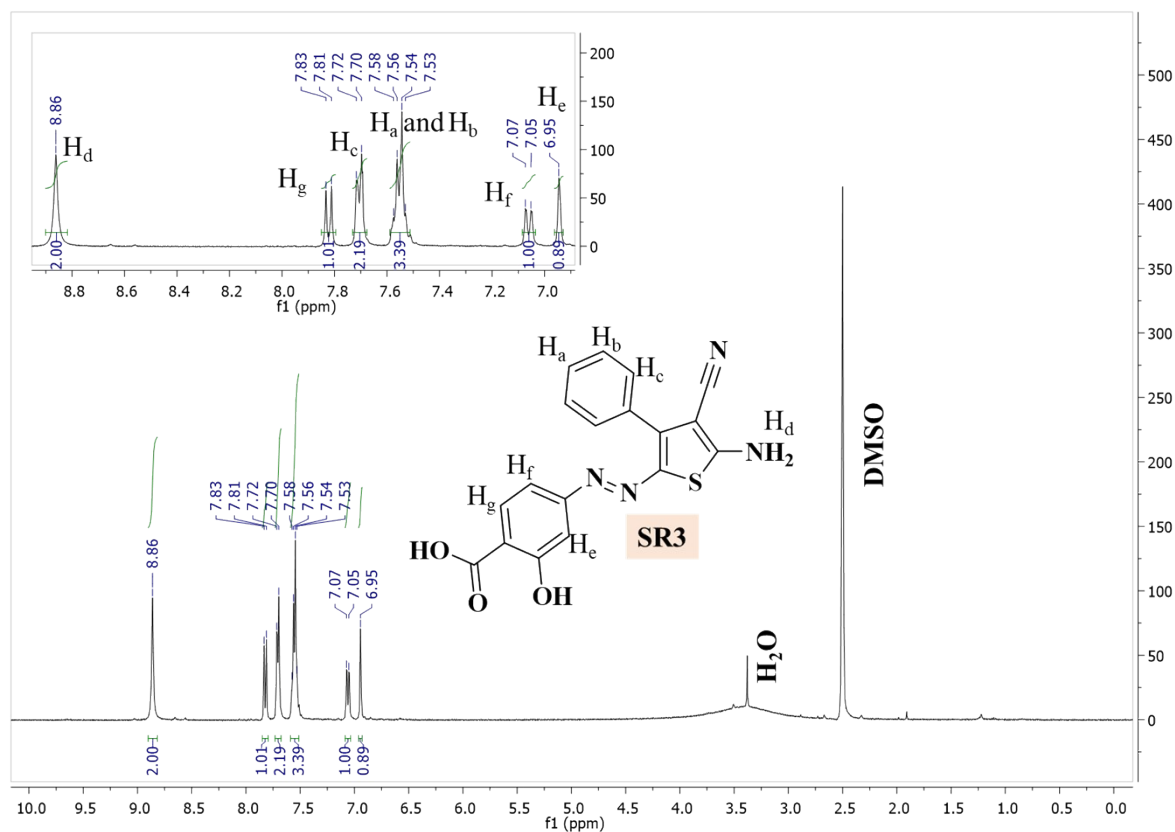

<sup>1</sup>H NMR (400 MHz, DMSO-d<sub>6</sub>) δ (H<sub>d</sub>) 8.86 (s, 2H), (H<sub>g</sub>) 7.82 (d, J = 8.5 Hz, 1H), (H<sub>c</sub>) 7.71 (d, J = 8.0 Hz, 2H), (H<sub>a</sub> and H<sub>b</sub>) 7.55 (m, J = 5.4 Hz, 3H), (H<sub>f</sub>) 7.06 (d, J = 8.4 Hz, 1H), (H<sub>e</sub>) 6.95 (s, 1H).

| Peak names     | δ (ppm) | Signal            |
|----------------|---------|-------------------|
| H <sub>a</sub> | 7.55    | m, J = 5.4 Hz, 3H |
| H <sub>b</sub> |         |                   |
| H <sub>c</sub> | 7.71    | d, J = 8.0 Hz, 2H |
| H <sub>d</sub> | 8.86    | s, 2H             |
| H <sub>e</sub> | 6.95    | s, 1H             |
| H <sub>f</sub> | 7.06    | d, J = 8.4 Hz, 1H |
| H <sub>g</sub> | 7.82    | d, J = 8.5 Hz, 1H |

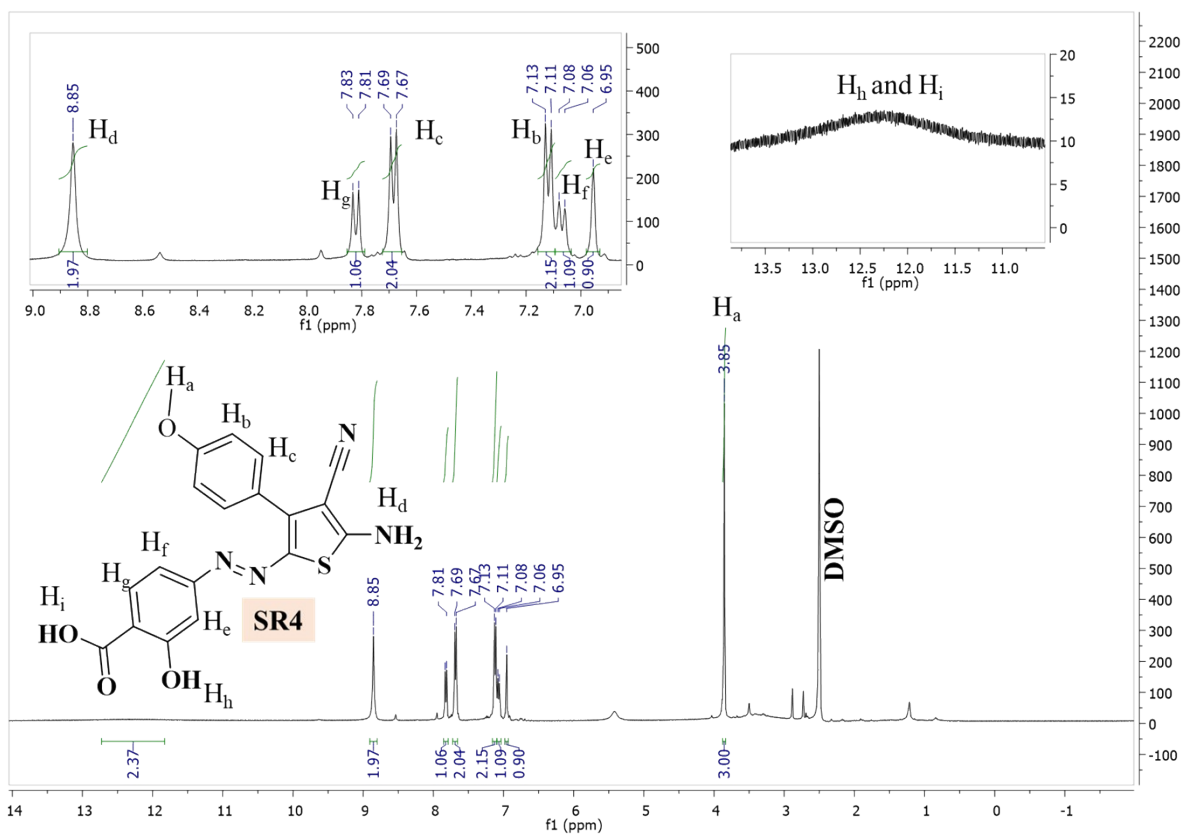

<sup>1</sup>H NMR (400 MHz, DMSO-*d*<sup>6</sup>) δ (H<sub>h</sub> and H<sub>i</sub>) 11.0 to 13.5 (Broad s, 2H), (H<sub>d</sub>) 8.85 (s, 2H), (H<sub>g</sub>) 7.82 (d, J = 8.5 Hz, 1H), (H<sub>c</sub>) 7.68 (d, J = 8.5 Hz, 2H), (H<sub>b</sub>) 7.12 (d, J = 8.5 Hz, 2H), (H<sub>f</sub>) 7.07 (d, J = 8.5 Hz, 1H), (H<sub>e</sub>) 6.95 (s, 1H), (H<sub>a</sub>) 3.85 (s, 3H).

| Peak names     | δ (ppm)                         | Signal            |
|----------------|---------------------------------|-------------------|
| H <sub>a</sub> | 3.85                            | s, 3H             |
| H <sub>b</sub> | 7.12                            | d, J = 8.5 Hz, 2H |
| H <sub>c</sub> | 7.68                            | d, J = 8.5 Hz, 2H |
| H <sub>d</sub> | 8.85                            | s, 2H             |
| H <sub>e</sub> | 6.95                            | s, 1H             |
| H <sub>f</sub> | 7.07                            | d, J = 8.5 Hz, 1H |
| H <sub>g</sub> | 7.82                            | d, J = 8.5 Hz, 1H |
| H <sub>h</sub> | Weak broad singlet 11.0 to 13.5 | Broad s, 2H       |
| H <sub>i</sub> |                                 |                   |

# $^{13}\text{C}$ NMR Spectrum

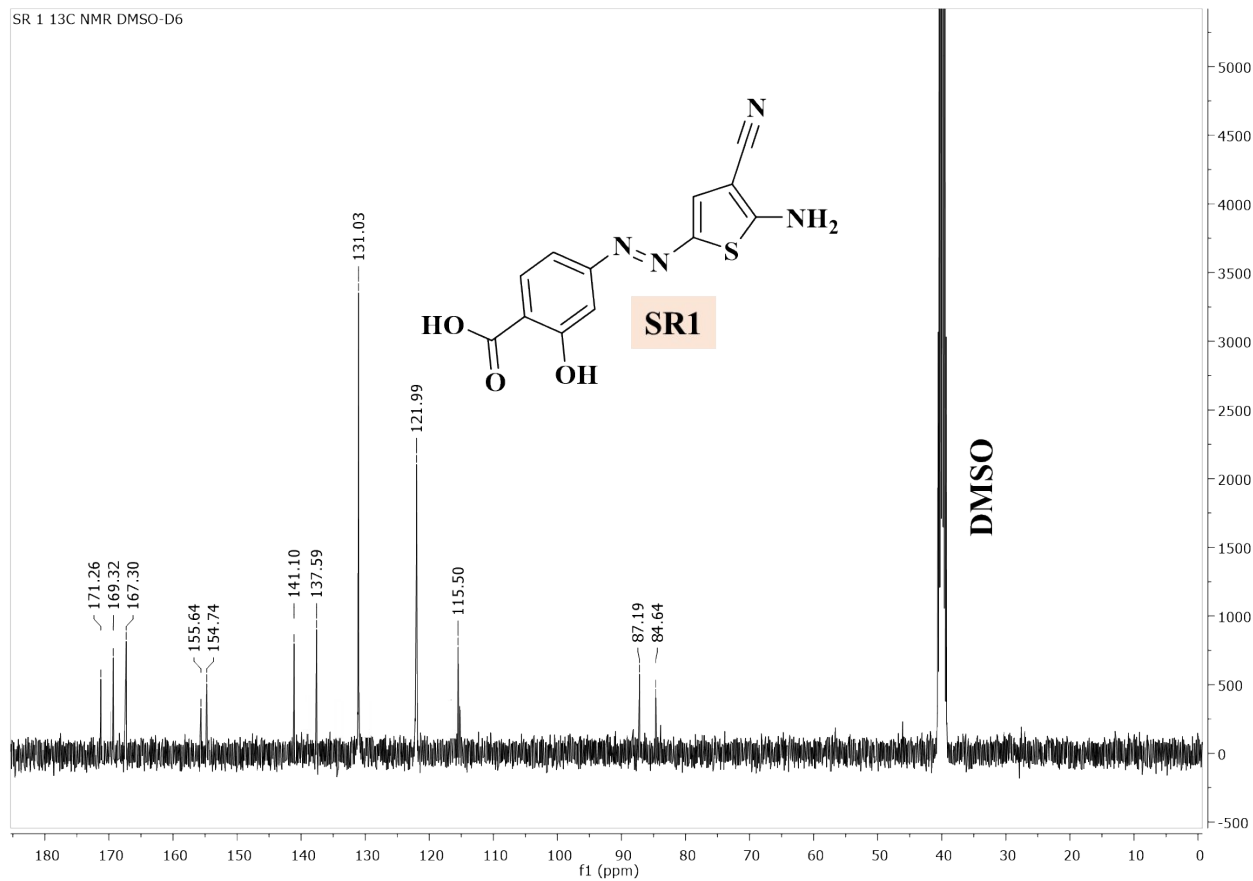

$^{13}\text{C}$  NMR (101 MHz, DMSO- $d_6$ )  $\delta$  171.26, 169.32, 167.30, 155.64, 154.74, 141.10, 137.59, 131.03, 121.99, 115.50, 87.19, 84.64.



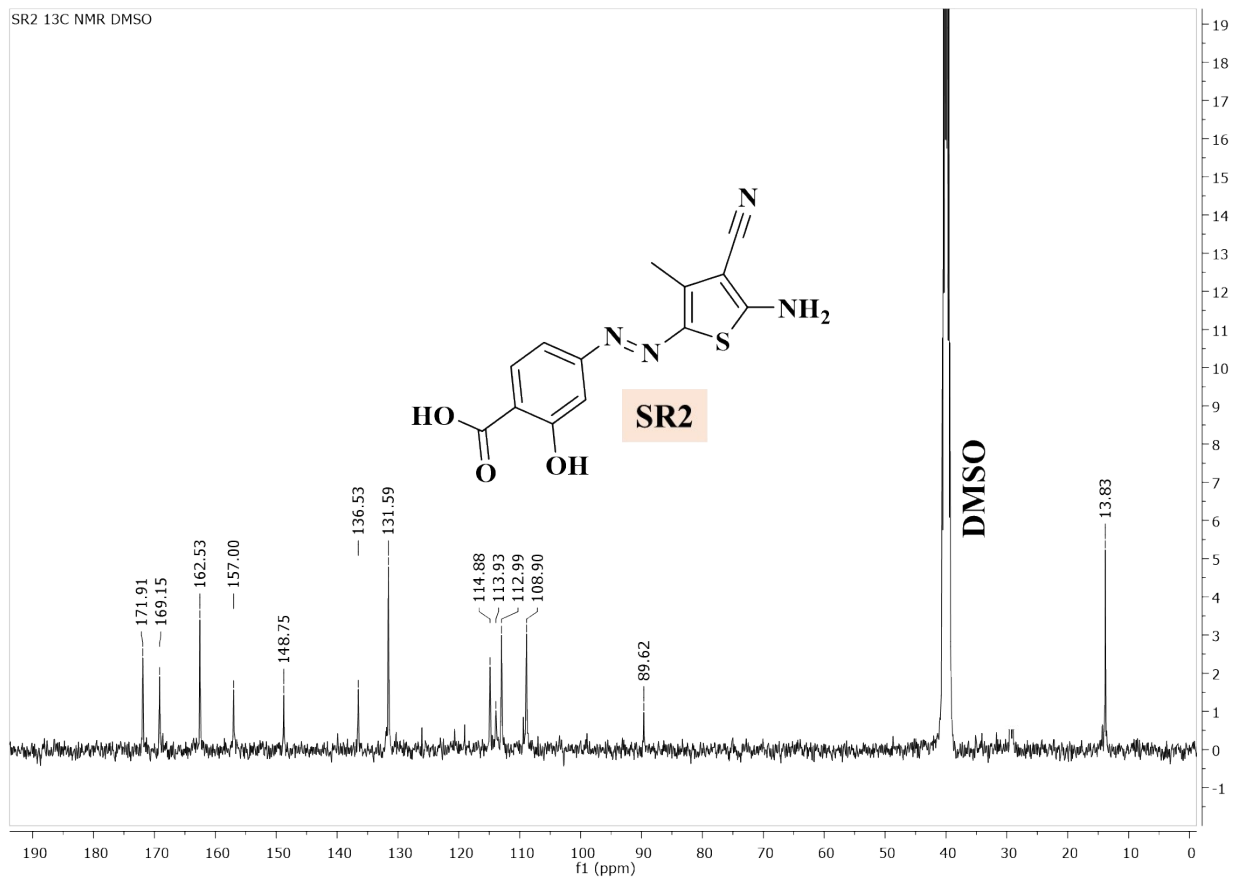

$^{13}\text{C}$  NMR (101 MHz,  $\text{DMSO-d}_6$ )  $\delta$  171.91, 169.15, 162.53, 157.00, 148.75, 136.53, 131.59, 114.88, 113.93, 112.99, 108.90, 89.62, 13.83.

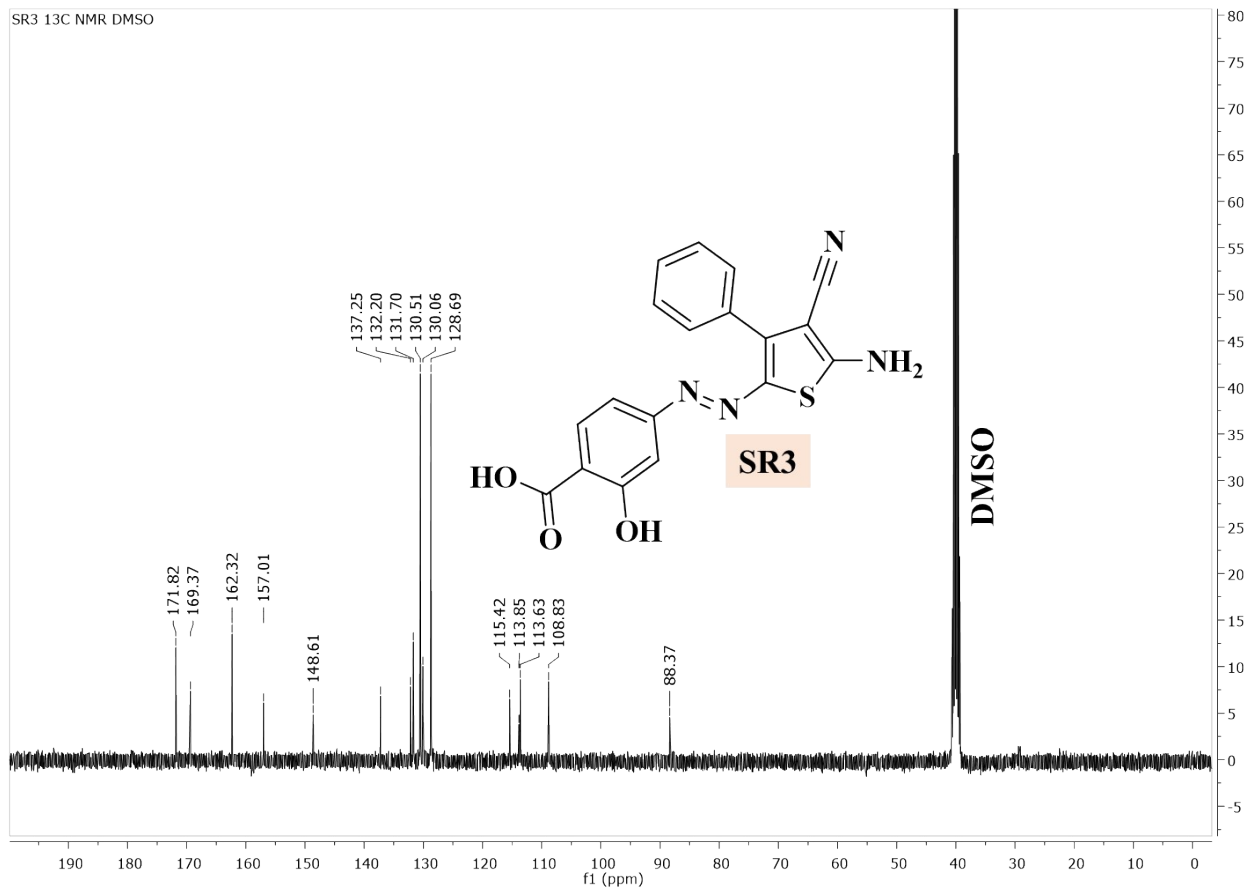

$^{13}\text{C}$  NMR (101 MHz,  $\text{DMSO-d}_6$ )  $\delta$  171.82, 169.37, 162.32, 157.01, 148.61, 137.25, 132.20, 131.70, 130.51, 130.06, 128.69, 115.42, 113.85, 113.63, 108.83, 88.37.

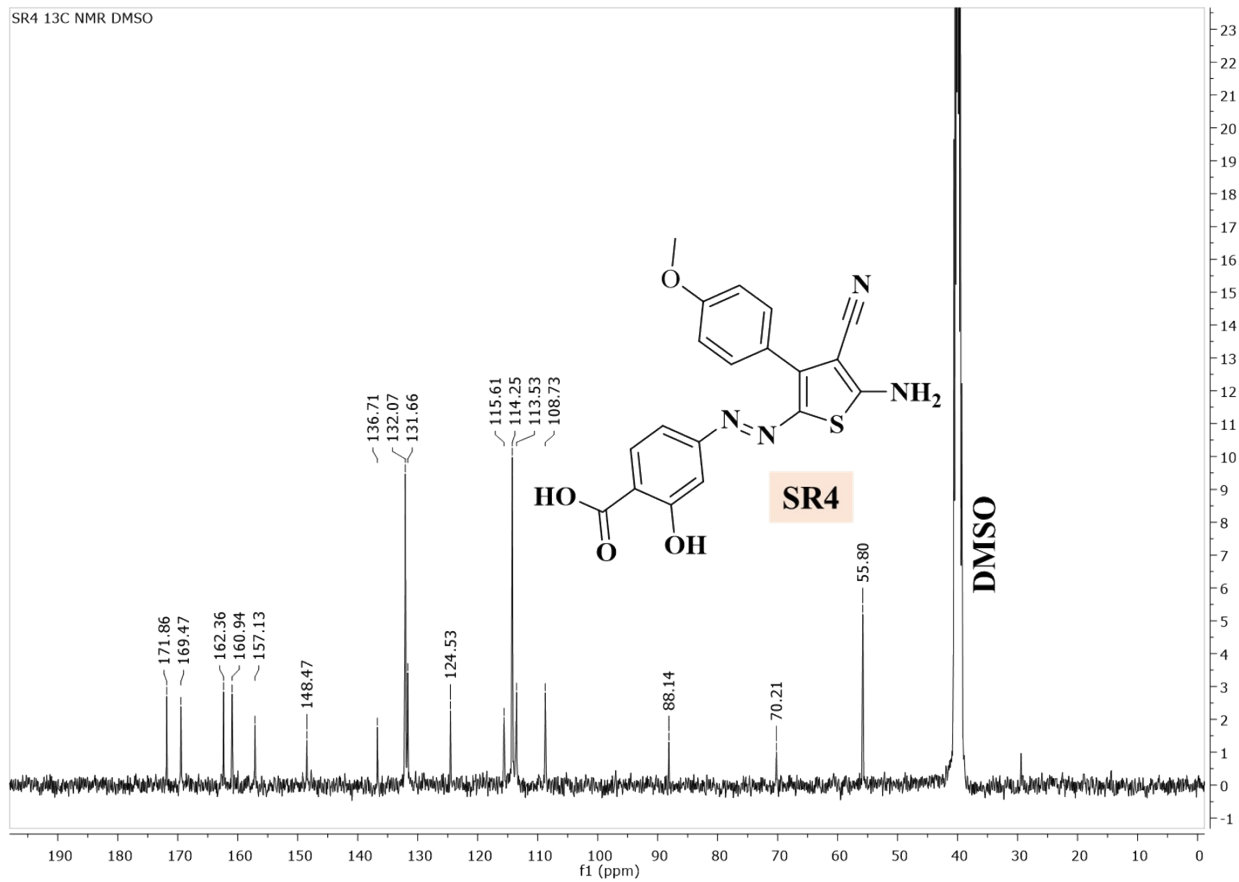

$^{13}\text{C}$  NMR (101 MHz, DMSO- $d_6$ )  $\delta$  171.86, 169.47, 162.36, 160.94, 157.13, 148.47, 136.71, 132.07, 131.66, 124.53, 115.61, 114.25, 113.89, 108.73, 88.14, 70.21, 55.80.

# HRMS spectrum

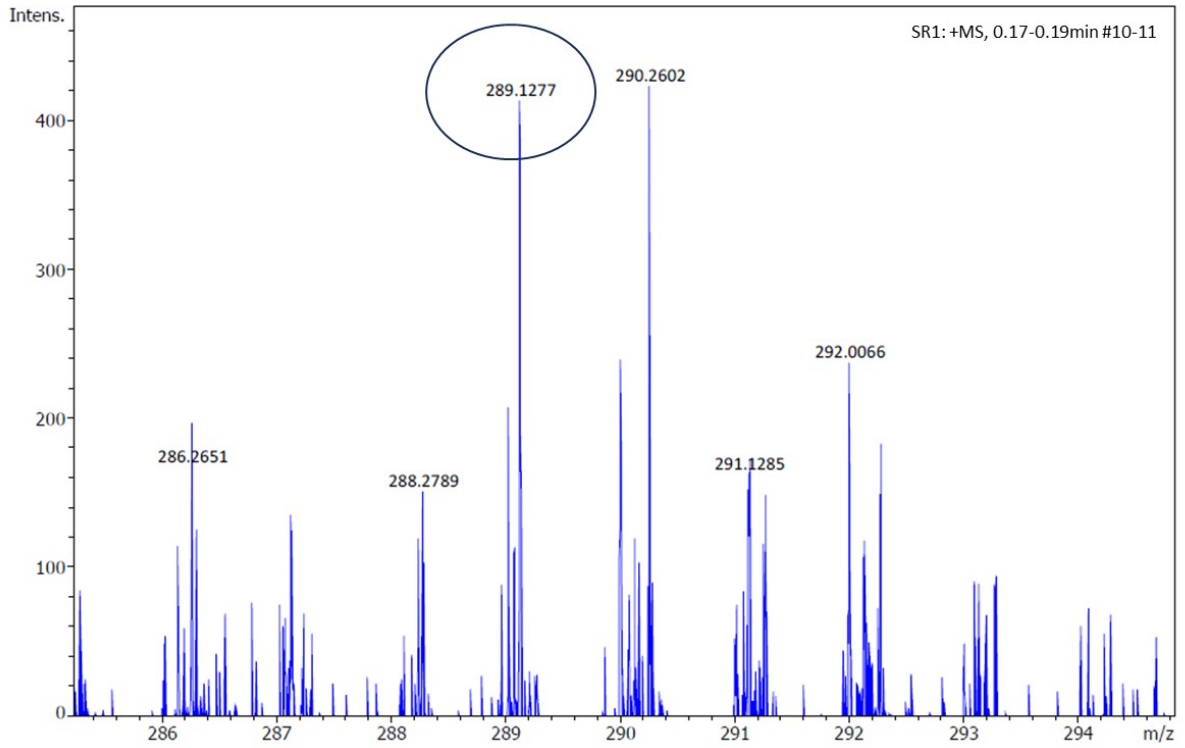

SR1 MS (m/z): calculated 288.03, for  $C_{12}H_8N_4O_3S$  [M+H] + found 289.12

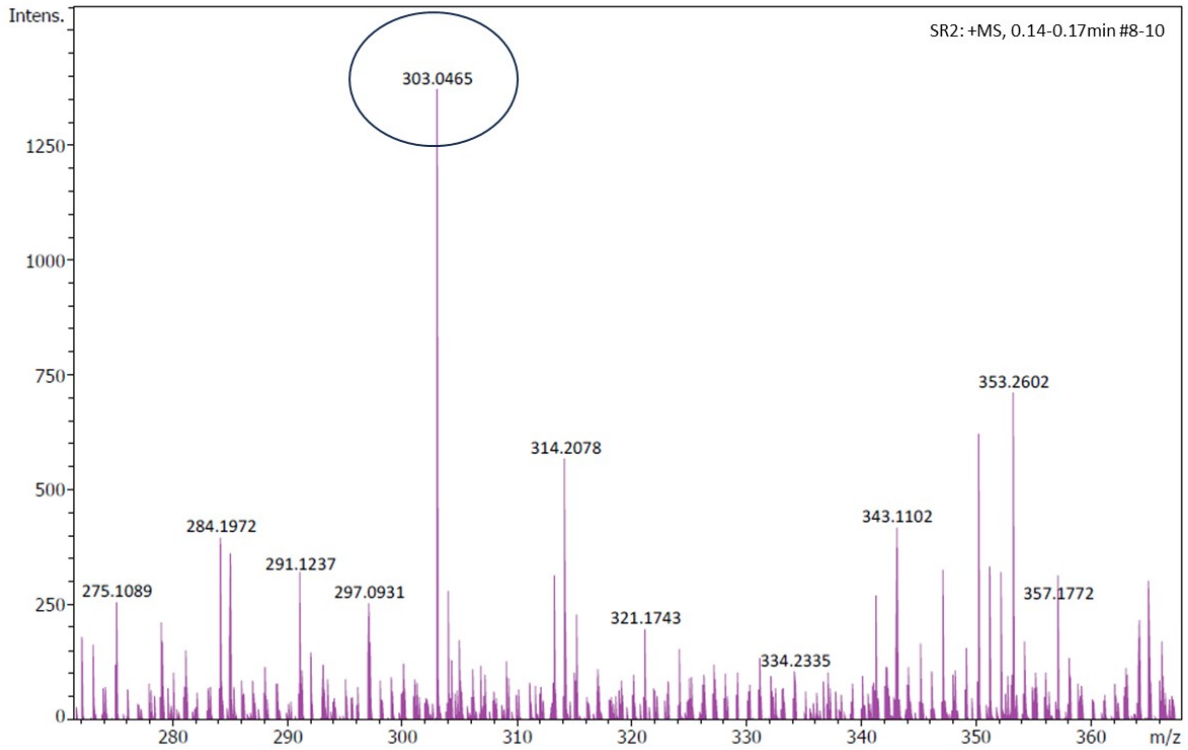

SR2 MS (m/z): calculated 302.05, for  $C_{13}H_{10}N_4O_3S$  [M+H] + found 303.04

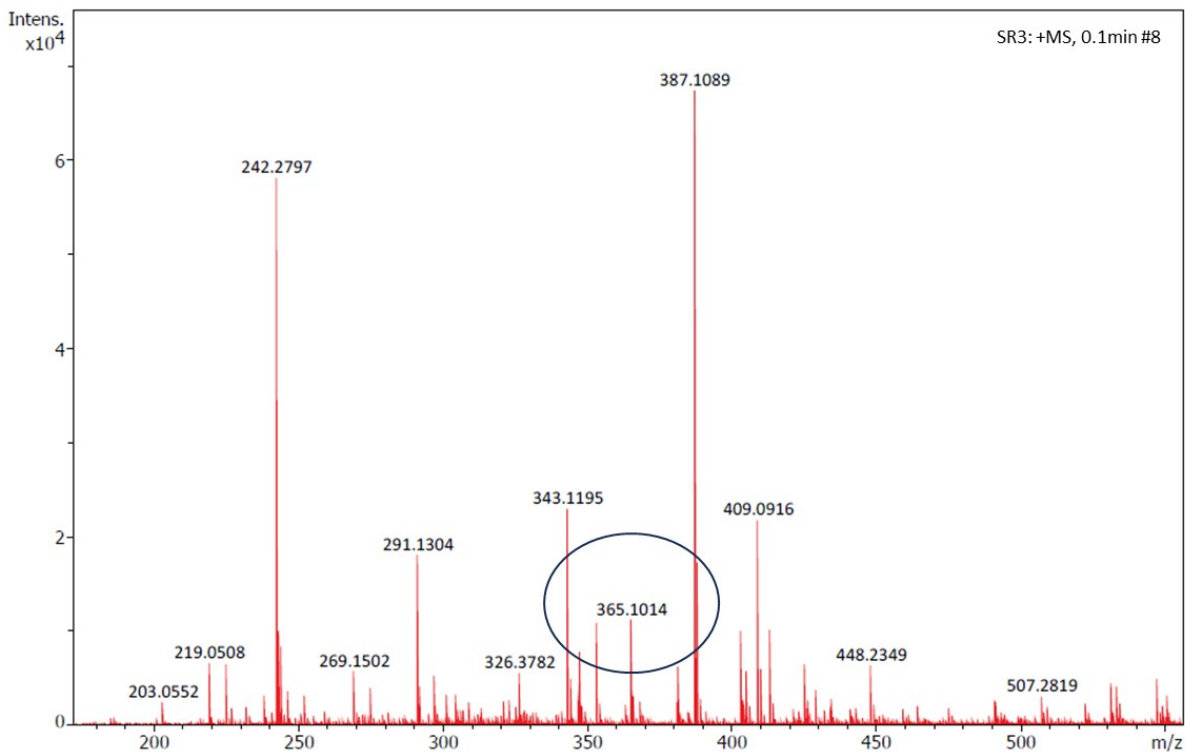

SR3 MS (m/z): calculated 364.06, for  $C_{18}H_{12}N_4O_3S$  [M+H]<sup>+</sup> + found 365.10

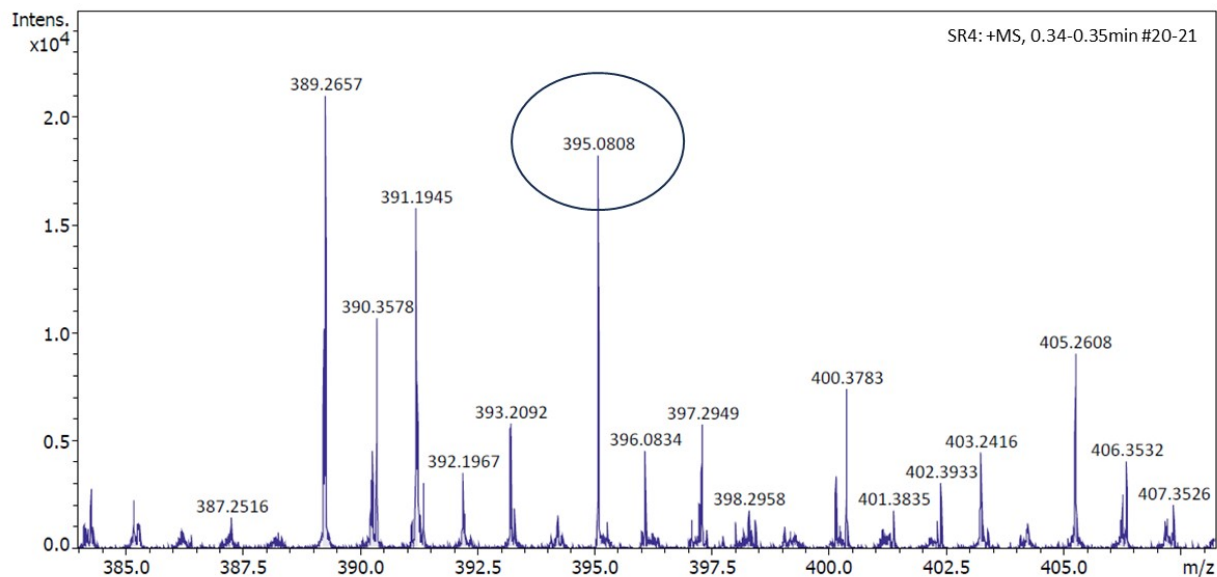

SR4 MS (m/z): calculated 394.07, for  $C_{19}H_{14}N_4O_4S$  [M+H]<sup>+</sup> + found 395.08

## DOS Spectrum of title dyes and dyes@TiO<sub>2</sub>

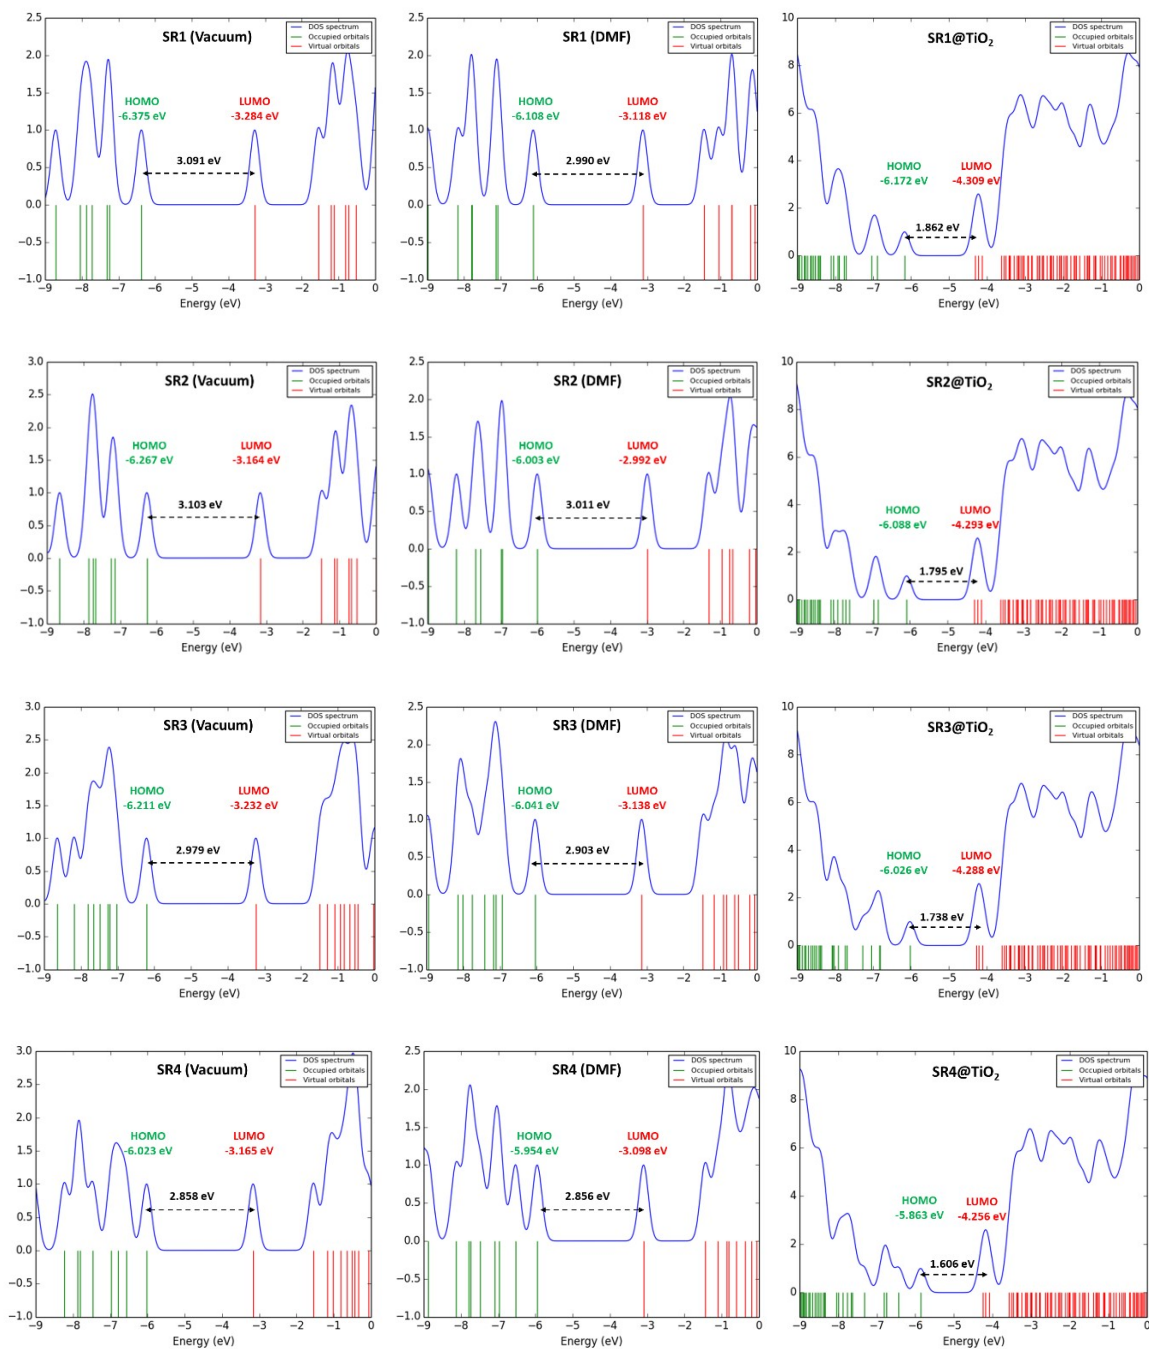

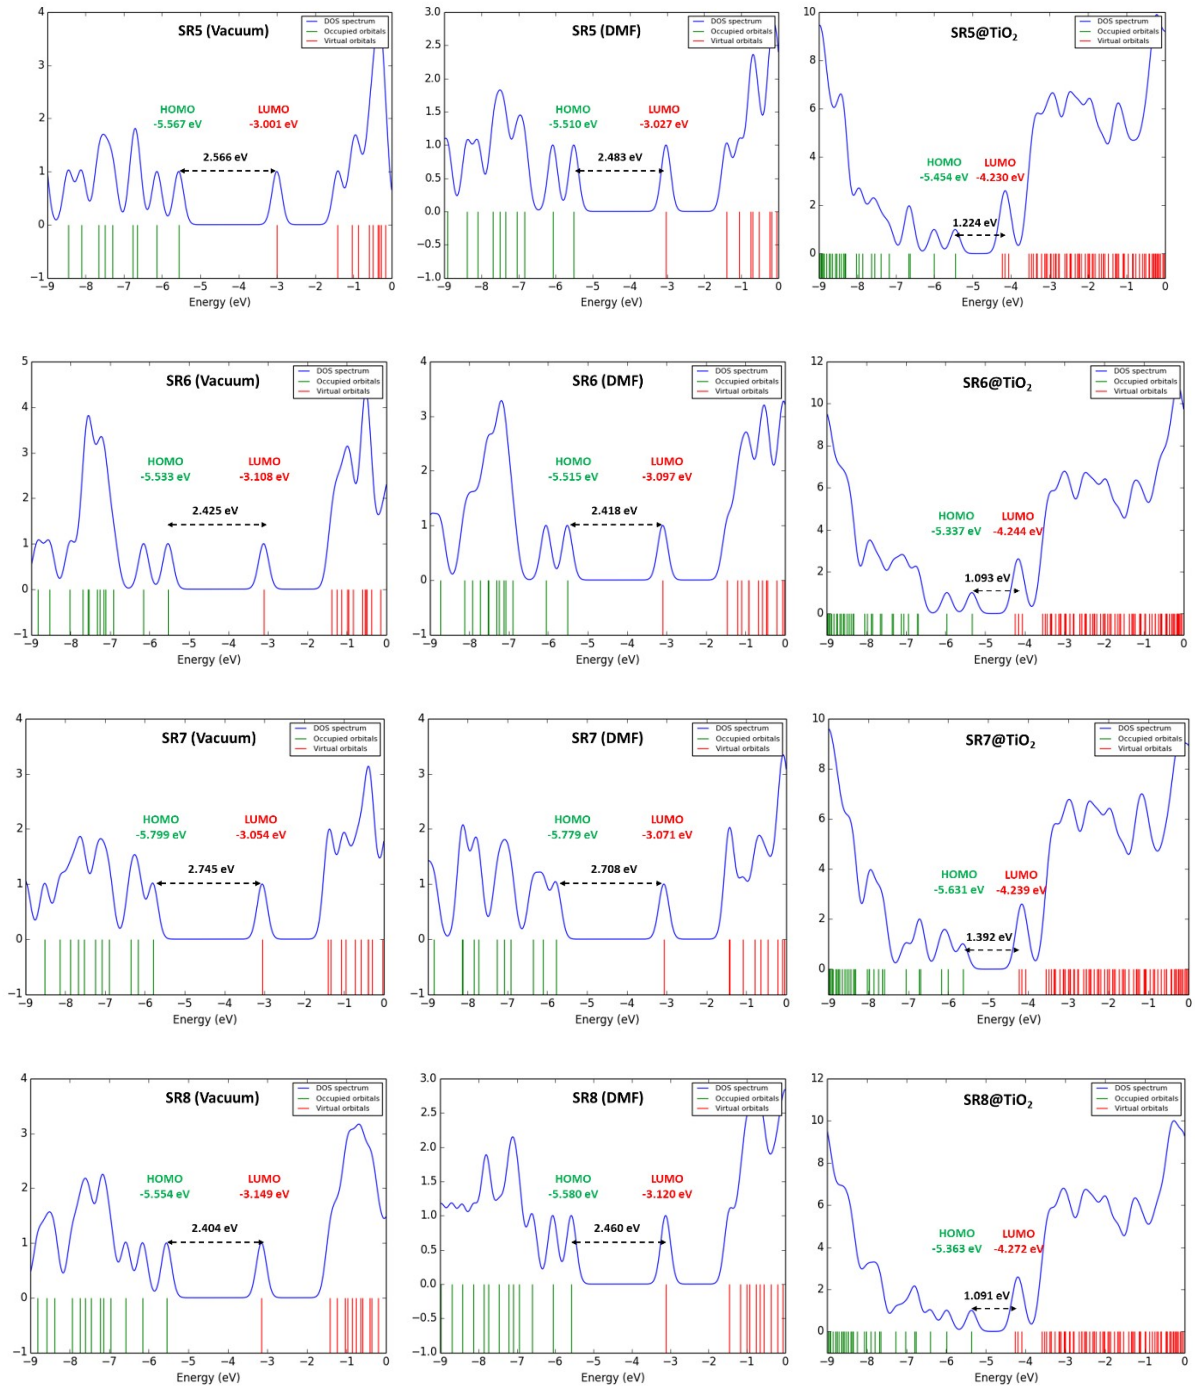

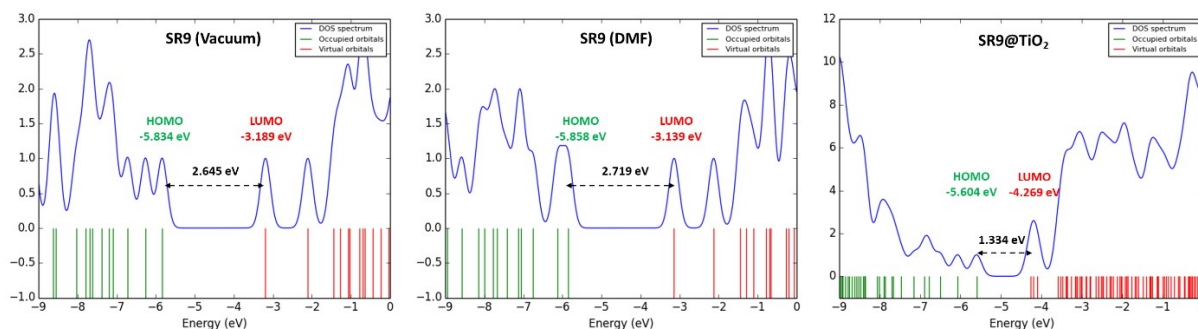

## References

- 1 M. Grätzel, Recent Advances in Sensitized Mesoscopic Solar, *Acc. Chem. Res.*, 2009, **42**, 1788–1798.
- 2 A. Slimi, M. Hachi, A. Fitri, A. T. Benjelloun, S. Elkhatabi, M. Benzakour, M. Mcharfi, M. Khenfouch, I. Zorkani and M. Bouachrine, Effects of electron acceptor groups on triphenylamine-based dyes for dye-sensitized solar cells: Theoretical investigation, *J. Photochem. Photobiol. A Chem.*, DOI:10.1016/j.jphotochem.2020.112572.
- 3 W. Sang-aroon, S. Saekow and V. Amornkitbamrung, Density functional theory study on the electronic structure of Monascus dyes as photosensitizer for dye-sensitized solar cells, *Journal Photochem. Photobiol. A Chem.*, 2012, **236**, 35–40.
- 4 J. Zhang, Y. Kan, H. Li, Y. Geng, Y. Wu and Z. Su, How to design proper p-spacer order of the D-p-A dyes for DSSCs? A density functional response, *Dye. Pigment.*, 2012, **95**, 313–321.
- 5 S. J. Sharma and N. Sekar, Charge Transfer as Bridging Correlator for DSSC Efficiency and NLO Property, *ChemistrySelect*, DOI:10.1002/slct.202203262.
- 6 N. N. Ayare, S. Sharma, K. K. Sonigara, J. Prasad, S. S. Soni and N. Sekar, Synthesis and computational study of coumarin thiophene-based D- $\pi$ -A azo bridge colorants for DSSC and NLOphoric application, *J. Photochem. Photobiol. A Chem.*, 2020, **394**, 112466.
- 7 J. Romiszewski, Z. Puterová-Tokarová, J. Mieczkowski and E. Gorecka, Optical properties of thiophene-containing liquid crystalline and hybrid liquid crystalline materials, *New J. Chem.*, 2014, **38**, 2927–2934.
- 8 S. L. Broman, S. L. Brand, C. R. Parker, M. Å. Petersen, C. G. Tortzen, A. Kadziola, K. Kilsa and M. B. Nielsen, Optimized synthesis and detailed NMR spectroscopic characterization of the 1,8a-dihydroazulene-1,1-dicarbonitrile photoswitch, *Arkivoc*, 2011, **2011**, 51–67.
- 9 W. W. Wardakhan, H. Z. Shams and H. E. Moustafa, Synthesis of polyfunctionally substituted thiophene, thieno[2,3-b]pyridine and thieno[2,3-d]pyrimidine derivatives, *Phosphorus, Sulfur Silicon Relat. Elem.*, 2005, **180**, 1815–1827.
